# Supplementary material for: Kids in Action: the protocol of a Youth Participatory Action Research project to promote physical activity and dietary behaviour
Source: PubMed Central journal article supplement — BMJ Open. 2019 Mar 30;9(3):e025584. doi: 10.1136/bmjopen-2018-025584 (PMC6475341; doi:10.1136/bmjopen-2018-025584), 2019-03-30
Supplement: bmjopen-2018-025584.draft_revisions.pdf [file bmjopen-2018-025584.draft_revisions.pdf]

# BMJ Open

BMJ Open is committed to open peer review. As part of this commitment we make the peer review history of every article we publish publicly available.

When an article is published we post the peer reviewers' comments and the authors' responses online. We also post the versions of the paper that were used during peer review. These are the versions that the peer review comments apply to.

The versions of the paper that follow are the versions that were submitted during the peer review process. They are not the versions of record or the final published versions. They should not be cited or distributed as the published version of this manuscript.

BMJ Open is an open access journal and the full, final, typeset and author-corrected version of record of the manuscript is available on our site with no access controls, subscription charges or pay-per-view fees (<http://bmjopen.bmj.com>).

If you have any questions on BMJ Open's open peer review process please email [info.bmjopen@bmj.com](mailto:info.bmjopen@bmj.com)

# BMJ Open

## **Kids in Action: The study design of a Youth Participatory Action Research project to promote physical activity and dietary behaviour**

|                               |                                                                                                                                                                                                                                                                                        |
|-------------------------------|----------------------------------------------------------------------------------------------------------------------------------------------------------------------------------------------------------------------------------------------------------------------------------------|
| Journal:                      | <i>BMJ Open</i>                                                                                                                                                                                                                                                                        |
| Manuscript ID                 | bmjopen-2018-025584                                                                                                                                                                                                                                                                    |
| Article Type:                 | Protocol                                                                                                                                                                                                                                                                               |
| Date Submitted by the Author: | 26-Jul-2018                                                                                                                                                                                                                                                                            |
| Complete List of Authors:     | Anselma, Manou; Amsterdam UMC, Vrije Universiteit Amsterdam, Public and Occupational Health<br>Altenburg, T; Amsterdam UMC, Vrije Universiteit Amsterdam, Public and Occupational Health<br>Chinapaw, Mai; Amsterdam UMC, Vrije Universiteit Amsterdam, Public and Occupational Health |
| Keywords:                     | Youth participatory action research, Deprived neighbourhood, Physical activity, Dietary behaviour                                                                                                                                                                                      |
|                               |                                                                                                                                                                                                                                                                                        |

SCHOLARONE™  
Manuscripts

1  
2  
3  
4  
5 **Kids in Action: The study design of a Youth Participatory Action Research**  
6 **project to promote physical activity and dietary behaviour**  
7  
8

9 Manou Anselma

10 Department of Public and Occupational Health, Amsterdam Public Health Research Institute,  
11 VU University Medical Center, van der Boechorststraat 7, 1081 BT Amsterdam, The  
12 Netherlands; E: m.anselma@vumc.nl; Tel.: +31-205-611-240  
13  
14

15 Teatske M. Altenburg

16 Department of Public and Occupational Health, Amsterdam Public Health Research Institute,  
17 VU University Medical Center, Amsterdam, The Netherlands  
18

19 Mai J. M. Chinapaw

20 Department of Public and Occupational Health, Amsterdam Public Health Research Institute,  
21 VU University Medical Center, Amsterdam, The Netherlands  
22  
23  
24  
25  
26  
27  
28  
29  
30  
31  
32  
33  
34  
35  
36  
37  
38  
39  
40  
41  
42  
43  
44  
45  
46  
47  
48  
49  
50  
51  
52

53 Word count: 4527  
54  
55  
56  
57  
58  
59  
60

## Kids in Action: The study design of a Youth Participatory Action Research project to promote physical activity and dietary behaviour

Manou Anselma\*, Teatske M. Altenburg, and Mai J. M. Chinapaw

Department of Public and Occupational Health, Amsterdam Public Health Research Institute, VU University Medical Center, van der Boechorststraat 7, 1081 BT Amsterdam, The Netherlands; t.altenburg@vumc.nl (T.A.); m.chinapaw@vumc.nl (M.C.)

\* Correspondence: m.anselma@vumc.nl (M.A.); Tel.: +31-205-611-240

### ABSTRACT

**Introduction** In this study, researchers collaborate with children from a deprived neighbourhood in Amsterdam in developing, implementing and evaluating interventions targeting their health behaviours. This Youth Participatory Action Research (YPAR) project focuses on the promotion of physical activity and healthy dietary behaviour.

**Methods and analysis** This study is a controlled trial using participatory methods to develop interventions together with 9 - 12-year-old children. At four primary schools in a deprived neighbourhood in Amsterdam an 'Action Team' was installed: a group of six to eight children who actively participate as co-researchers in developing, implementing and evaluating interventions. An academic researcher facilitates the participatory process. Four control schools, also located in deprived areas in and around Amsterdam, continue with their regular curriculum and do not participate in the participatory process. For the effect evaluation, physical activity and sedentary behaviour is assessed using: accelerometers and self-reporting; dietary behaviour using self-reporting; and motor fitness (strength, flexibility, coordination, speed, endurance) using the MOPER fitness test. Effectiveness of the interventions will be evaluated by multi-level regression analysis. The process of co-creating interventions and the implemented interventions will be continually evaluated during meetings of the Action Teams and with children participating in the interventions. Empowerment of children is evaluated during focus groups. Summaries and transcripts of meetings are coded and analysed to enrich children's findings.

**Discussion** Using YPAR methodology with 9 - 12-year-old children is novel and promising based on results with youth.

**Ethics and dissemination** The Medical Ethics Committee of the VU Medical Center concluded that this protocol does not fall within the scope of the Medical Research Involving Human Subjects Act (2016.366).

**Protocol registration** The study protocol has been registered at the Dutch trial registration [www.trialregister.nl](http://www.trialregister.nl) under number TC=6604.

#### Strengths and limitations of this study :

- This study is the first to combine Youth Participatory Action Research (YPAR) with Intervention Mapping (IM), ensuring that the development interventions are both evidence-based and matching the interests and needs of the specific target group.
- The study design is a controlled trial, which is unique in YPAR.
- This study is embedded in the community involving a multidisciplinary project group. This aids the sustainability of the interventions.
- This study includes an effect evaluation as well as a process evaluation in which the YPAR process and empowerment of youth is evaluated.
- Randomization of schools into the intervention and control group was not possible because of the community approach.

## 1. INTRODUCTION

The number of children with overweight or obesity is growing worldwide and this public health problem is high on municipal and governmental agendas. This is no different in the Netherlands, where in 2016 on average there were 10.7% of the children between 8 and 12 years old with overweight/obesity<sup>1</sup>. In urban areas such as Amsterdam, the rates exceed the country's average, with prevalence rates of overweight/obesity of 12.8% among 5-year-olds and 20.9% among 10-year olds<sup>2</sup>. Even though the overweight numbers are stabilizing, health inequalities still exist<sup>3</sup>: children with overweight or obesity are not only disproportionately divided geographically, but also across income and ethnic groups<sup>4-6</sup>. Looking at race/ethnicity, children from minority groups show higher overweight/obesity rates than children from a majority group<sup>4 7 8</sup>. For example, in Amsterdam 10.4% of 5-year-old children with a Dutch ethnicity have overweight while this is almost 30% in 10-year-old children with a non-Western background<sup>3</sup>. In relation to income groups, in the Netherlands in the age category 4 - 25-year-olds, 11.2% of the highest income group had overweight, versus 18.0% of the lowest income group<sup>9</sup>. Similarly, in 2017 in Amsterdam 30.1% of the 10-year-old children with a very low socioeconomic status (SES) had overweight, versus 9.8% of the 10-year old children with a very high SES<sup>3</sup>. Importantly, children with overweight are at high risk of remaining overweight and are therefore also at higher risk for chronic illnesses during childhood and in their adult life<sup>10</sup>. This is why prevention of overweight in children is a priority for many health organizations, municipalities and ministries<sup>11 12</sup>.

Many interventions have been developed and implemented to tackle childhood obesity, but most show disappointing effects<sup>13 14</sup>. Strikingly, the most affected group of children – i.e. from families with a low SES and from non-Western backgrounds – is most difficult to reach through interventions<sup>15</sup>, thereby maintaining or even widening health inequalities<sup>16 17</sup>. One reason why these interventions show low participation and effectiveness in this target group could be because the target group is seldom involved in the development of the interventions<sup>18</sup>. Involving the target group is essential to connect to their needs and interests<sup>19</sup>, as this influences the reach and effectiveness of the intervention. Therefore, in the current research project – 'Kids in Action' – children from a deprived neighbourhood are engaged as co-researchers, i.e. applying Youth Participatory Action Research (YPAR). Children not only co-create interventions to improve their lifestyle and that of their peers

1  
2  
3 and family members, but also collaborate in the implementation and evaluation of these  
4 interventions. To structure this process, the systematic Intervention Mapping (IM)  
5 methodology is applied alongside YPAR. This combination of IM and YPAR ensures that the  
6 co-created interventions are appropriate to the interests and needs of the children, but also  
7 build on existing evidence.  
8  
9  
10

### 11 12 **1.1. Aims and objectives** 13

14 The overall aim of the 'Kids in Action' study is to develop, implement and evaluate  
15 interventions that stimulate a healthy lifestyle to reduce health inequalities in children from  
16 a low SES neighbourhood in collaboration with the children themselves. This study builds on  
17 a participatory needs assessment that was conducted in the same neighbourhood<sup>20</sup>. From  
18 this needs assessment, two main needs were identified: to improve physical activity and a  
19 healthy diet. The organized activities should be offered at a low price and at a nearby  
20 location, the education concerning a healthy diet should be organized in a fun and practical  
21 manner.  
22  
23  
24  
25  
26  
27  
28

29 The primary objective of this study is to evaluate whether designing interventions in  
30 collaboration with children can lead to interventions that are more effective in improving  
31 children's physical activity and dietary behaviour.  
32  
33

34 The secondary objective of this study is to evaluate the process of combining YPAR with IM.  
35 This includes evaluating the effects of participating in the YPAR process on the  
36 empowerment of children and the judgement of children and other stakeholders of  
37 interventions that were co-developed by their peers.  
38  
39  
40  
41

## 42 **2. METHODS** 43

44 The Medical Ethics Committee of the VU University Medical Center approved the protocol  
45 and concluded that this protocol does not fall within the scope of the Medical Research  
46 Involving Human Subjects Act (2016.366).  
47  
48  
49

### 50 **2.1. Participatory Action Research** 51

52 Participatory Action Research (PAR) aims to 'improve health and reduce health inequities' by  
53 working together with the community and consequently empowering the community by  
54 getting them to improve their own health<sup>21</sup>. Throughout the entire process of developing,  
55  
56  
57  
58  
59  
60

1  
2  
3 implementing and evaluating interventions, community members are involved as co-  
4 researchers and highly valued as experts of their own lives and experiences. At the same  
5 time, the community is empowered and experiences more ownership over their lives and  
6 livelihood.  
7

8  
9 This study specifically works together with children in the PAR process. YPAR engages youth  
10 as co-researchers in the research process. In this process, children identify problems in their  
11 living environment and become empowered to do something about it<sup>22-25</sup>. Children learn  
12 research skills so they can participate in research and have shared power over the research-  
13 and decision-making processes<sup>23 25 26</sup>.  
14  
15  
16  
17

## 18 19 **2.2. Patient and public involvement**

20 This study is initiated by academic researchers and a community organization. The  
21 municipality advises on the selection of the intervention neighbourhood, to recruit a  
22 neighbourhood with high health needs that can benefit from the project. As this study is  
23 informed by a participatory needs assessment (see section 1.1)<sup>20</sup>, the objectives and  
24 outcome measures of this study are determined in collaboration with children, parents and  
25 professionals working with children in the neighbourhood. The design of the study and  
26 recruitment procedures are decided by the academic researchers. The conduct of the study,  
27 the development of interventions and the dissemination of the results to the study  
28 participants and other relevant stakeholders, is decided together with the children.  
29  
30  
31  
32  
33  
34  
35  
36

## 37 **2.3. Participants**

38 The four intervention schools are all situated in one deprived neighbourhood in Amsterdam,  
39 where in 2015-2016 over 50% of the residents had a non-Western background, 27% of the  
40 10-year-olds were overweight/obese and in 2014 31% of the children under 18 years old  
41 grew up in a household defined as low-income<sup>27-29</sup>. Possible control schools are selected  
42 based on similarity in neighbourhood characteristics: overweight/obesity rates, household  
43 income and cultural background.  
44  
45  
46  
47  
48

49 Participants in this study are children from four intervention schools and four control schools  
50 in deprived neighbourhoods in Amsterdam, the Netherlands. The intervention schools  
51 participate in the YPAR process, including implementing and evaluating the developed  
52 interventions. The control schools only participate in the measurements for the effect  
53 evaluation.  
54  
55  
56  
57  
58  
59  
60

### 2.3.1. Recruitment

Following selection of a neighbourhood with high health needs, the intervention schools are contacted by the municipality to inform them about the project and to ask them if they are willing to participate. After the schools agree to participate, the main researcher contacts the schools to give them more information about the project. Control schools in the area of Amsterdam are contacted by the main researcher in a random order via e-mail or telephone until four schools are found that are willing to participate as control schools. Control schools are offered a presentation about the research results after the study is finished.

All 9 - 12-year-old children (i.e. children of the three highest grades in primary school) of the four intervention and four control schools are eligible to participate in the effect measurements of the project. For the YPAR process, children from intervention schools are invited to collaborate with academic researchers in co-researcher groups, named 'Action Teams'. For both the effect measurements and the Action Teams, every year new children can participate as the highest grade leaves the school and new children enter the third-highest grade. All children receive an information letter for themselves and for their parents about the measurements and the Action Team. Attached to the information letters for parents is an informed consent letter that at least one of the parents has to sign if they agree to the participation of their child. At all schools, the researcher explains the project in all classes before handing out the information letters. Children who participate in the measurements and/or in the Action Team receive a small gift.

### 2.4. Procedures

This section describes the five phases of the 'Kids in Action' project. See Figure 1 for an outline.

#### Phase 1: Creating partnerships

The first phase consists of creating partnerships with the schools and other stakeholders in the area, such as social workers, organizers of after-school activities and the community centres. Together with these stakeholders, a project group is started that meets every three months to discuss running projects in the neighbourhood and how partners can collaborate. In this phase, an IM expert group is also formed, to advise on how YPAR and IM should be combined. The IM expert group is involved throughout all phases of the study.



## Phase 2: Formation of Action Teams

In the second phase of the project, the Action Teams are formed. Each of the Action Teams consists of six to eight children, an academic researcher and a research assistant. Meetings with the principals of the four intervention schools are planned to decide upon recruitment methods for the Action Teams and to schedule the meetings. Subsequently, the Action Teams are formed and a general outline of the meetings is developed. In this phase, the baseline effect measurement (T0) is executed.

## Phase 3: Intervention development

In the third phase, the meetings of the Action Teams take place. The meetings with the Action Teams are ideally held biweekly during school hours for one hour. Despite not all schools agreeing to this in the needs assessment, the researchers try to schedule meetings during school hours to raise the children's motivation for participation<sup>20</sup>. If the schools do not agree with this, meetings are held weekly for 45 minutes, followed by a 45-minute sports session<sup>20</sup>.

The first three to four meetings are used to verify the data that was gathered in a participatory needs assessment and to decide on determinants that the interventions need to focus on<sup>20</sup>. The rest of the meetings (approximately 10 per year) are used to develop interventions targeting children's physical activity and healthy dietary habits. Throughout these meetings, capacity building takes place to help the children through the process of intervention development. Children learn for example about formulating a research question, different kinds of research methodologies, how to analyse qualitative data, how to translate this data into intervention ideas and practical steps that need to be taken when developing intervention plans. At the end of phase 3, pilots of the first intervention activities are carried out. The Action Teams are also asked to identify 'Champions', i.e. people who can help them with the development and implementation of the pilots. The results of this phase (i.e. the needs assessment, the intervention ideas and results of the pilots) are discussed with the stakeholders in the project group to make sure the interventions become a joint and sustainable effort.

At the end of the year, a focus group with the Action Teams and their peers is held to discuss the feeling of empowerment that the children of the neighbourhood experience as part of the process evaluation.

#### Phase 4: Implementation and evaluation of interventions

In the beginning of phase 4, new Action Teams are recruited/formed. Children who were in the Action Teams of the previous year can still participate and are approached first. With the new Action Teams, meetings are planned monthly. Champions are involved and asked to participate in the meetings when appropriate. Together with stakeholders from the project group and the Action Teams, the implementation plans are finalized and subsequently the interventions are implemented. Once the interventions are implemented, the meetings are used to evaluate the interventions. If the Action Teams feel the interventions are going well, they are encouraged to develop and implement additional intervention activities that focus on other determinants or a different subgroup<sup>30</sup>. At the end of the year, focus groups are held focusing on empowering children and evaluating interventions. The first effect measurement (T1) is also executed in this phase.

#### Phase 5: Gradual transfer of responsibilities

In phase 5, responsibilities are gradually transferred to the identified champions. Specific plans are made together with the champions and other stakeholders to continue the interventions and participatory process after this project has ended. The meetings with the (new) Action Teams continue to take place every month, and are used to evaluate and, if necessary, adapt the interventions and discuss new ideas for interventions. The post-intervention effect measurement (T2) is executed in this phase. The study ends in November 2019.

## 2.5. Measurements

### 2.5.1. Effect evaluation

The primary outcomes of this study include measures of dietary behaviour, physical activity, sedentary behaviour, self-rated health, and physical fitness. Dietary behaviour, physical activity and screen behaviour is measured by self-report. Additionally, physical activity and sedentary behaviour is measured using an accelerometer. Motor fitness is measured using the MOPER fitness test. In the first school year (T0), questionnaire and accelerometer data are gathered in the period September-October 2016. The fitness tests take place in March-April 2017, 2018 and 2019.

### Questionnaire

A questionnaire is developed containing questions on: the number of small (e.g. crisps, nuts, chocolate) and large (e.g. hamburger, fries, pizza) snacks children eat; the number of sugar-sweetened beverages they drink; their sports and outdoor play participation; their attitude towards sports and outdoor play; their screen behaviour; and their self-rated health. The questionnaire is based on validated items from the ENERGY child questionnaire<sup>31</sup>, the DOIT questionnaire<sup>32</sup>, and the Euroqol<sup>33</sup>. Table 1 presents the questionnaire items, and the validity and reliability of the original items.

The children fill in the questionnaire during school hours, in the presence of a researcher who explains the procedure of completing the questionnaire before handing out the questionnaires. The children are requested to go through the questionnaire section by section, with the researcher giving a short explanation about each section before the participants fill in that specific section. In this way, examples can be given, for example by showing different sizes of soda cans, and all participants finish at the same time. The questionnaire takes approximately 40 minutes to complete.

Data entry of the multiple-choice questions is done through digital scanning and transferred into SPSS by an independent organization. Qualitative data are manually entered in SPSS.

**Table 1: Questionnaire items, their origin, and reliability and validity<sup>31-33</sup>**

| Questionnaire item                                                                                                                         | Question derived from                                                               | Reliability (ICC/k)/Validity (ICC/k)                                                                                                                                                                                                                     |
|--------------------------------------------------------------------------------------------------------------------------------------------|-------------------------------------------------------------------------------------|----------------------------------------------------------------------------------------------------------------------------------------------------------------------------------------------------------------------------------------------------------|
| 1. How many days a week do you drink sugar-sweetened beverages?                                                                            | ENERGY child questionnaire                                                          | 0.71/0.59                                                                                                                                                                                                                                                |
| 2. On a day you drink sugar-sweetened beverages, how many glasses/small bottles (250ml), cans (330ml) or big bottles (500ml) do you drink? | Combination ENERGY child questionnaire, DOIT questionnaire                          | ENERGY<br>Glasses/small bottles (250ml) 0.59/0.24<br>Cans (330ml) 0.53/0.44<br>Big bottles (500ml) 0.58/-0.01<br><br>DOIT<br>Cartons/small bottles (200ml) 0.74/0.12<br>Glasses (200ml) 0.45/0.47<br>Cans (330ml) 0.61/0.24<br>Bottles (500ml) 0.28/0.17 |
| 3. How many days a week do you drink energy drinks or sports drinks?                                                                       | Added based on Q1                                                                   |                                                                                                                                                                                                                                                          |
| 4. On a day you drink energy drinks or sports drinks, how many small cans/bottles (250ml) or big cans/bottles (500ml) do you drink?        | Added based on Q2                                                                   |                                                                                                                                                                                                                                                          |
| 5. How many school days per week do you eat sweets?                                                                                        | DOIT questionnaire (adapted)<br>Original: 'How many days a week do you eat sweets?' | 0.66/0.60                                                                                                                                                                                                                                                |
| 6. When you eat candy on a school day, how much sweets do you eat?                                                                         | DOIT questionnaire                                                                  | 0.71/0.21                                                                                                                                                                                                                                                |
| 7. How many days in the weekend (Saturday/Sunday) do you eat sweets?                                                                       | DOIT questionnaire (adapted)<br>Original: 'How many days a week do you eat sweets?' | 0.66/0.60                                                                                                                                                                                                                                                |
| 8. When you eat sweets on a day in the weekend, how much candy do you eat?                                                                 | DOIT questionnaire                                                                  | 0.73/0.07                                                                                                                                                                                                                                                |

|                                                                                                                                                                                                                                                                 |                                                                                                                                                                                                                                                                                                                                                                                                   |                                                                                                                |
|-----------------------------------------------------------------------------------------------------------------------------------------------------------------------------------------------------------------------------------------------------------------|---------------------------------------------------------------------------------------------------------------------------------------------------------------------------------------------------------------------------------------------------------------------------------------------------------------------------------------------------------------------------------------------------|----------------------------------------------------------------------------------------------------------------|
| 9. How many schooldays per week do you eat snacks?                                                                                                                                                                                                              | DOiT questionnaire (adapted)<br>Original: 'How many days a week do you eat snacks?'                                                                                                                                                                                                                                                                                                               | 0.50/-0.11                                                                                                     |
| 10. When you eat snacks on a school day, how many small and large snacks do you eat?                                                                                                                                                                            | DOiT questionnaire                                                                                                                                                                                                                                                                                                                                                                                | Small snacks 0.62/0.13<br>Large snacks 0.58/-0.08                                                              |
| 11. How many days in the weekend (Saturday/Sunday) do you eat snacks?                                                                                                                                                                                           | DOiT questionnaire (adapted)<br>Original: 'How many days a week do you eat snacks?'                                                                                                                                                                                                                                                                                                               | 0.50/-0.11                                                                                                     |
| 12. When you eat snacks in the weekend (Saturday/Sunday), how many small and large snacks do you eat?                                                                                                                                                           | DOiT questionnaire                                                                                                                                                                                                                                                                                                                                                                                | Small snacks 0.53/0.44<br>Large snacks 0.64/0.08                                                               |
| 13. How do you usually travel to school?                                                                                                                                                                                                                        | DOiT questionnaire                                                                                                                                                                                                                                                                                                                                                                                | Not in test-retest study                                                                                       |
| 14. How long does it take you to get from home to school?                                                                                                                                                                                                       | DOiT questionnaire + ENERGY child questionnaire (adapted)<br>Original: 'If you walk/bike to school, how long does it take you?'                                                                                                                                                                                                                                                                   | DOiT<br>Walking 0.65/ zero variance<br>Biking 0.91/0.68<br><br>ENERGY<br>Walking 0.70/0.59<br>Biking 0.81/0.66 |
| 15. What do you usually do when you play outside at school?                                                                                                                                                                                                     | ENERGY child questionnaire                                                                                                                                                                                                                                                                                                                                                                        | 0.80/0.65                                                                                                      |
| 16. I like playing outside                                                                                                                                                                                                                                      | ENERGY child questionnaire - Adapted from Q20                                                                                                                                                                                                                                                                                                                                                     |                                                                                                                |
| 17. I play outside never/1-2 times a week/3-4 times a week/5-6 times a week/every day                                                                                                                                                                           | Added                                                                                                                                                                                                                                                                                                                                                                                             |                                                                                                                |
| 18. When you play outside after school, what do you do?                                                                                                                                                                                                         | ENERGY child questionnaire – Adapted from Q15                                                                                                                                                                                                                                                                                                                                                     |                                                                                                                |
| 19. When you play outside after school, how long do you play? (fill in the number of hours per day in table)                                                                                                                                                    | Added                                                                                                                                                                                                                                                                                                                                                                                             |                                                                                                                |
| 20. I like playing sports                                                                                                                                                                                                                                       | ENERGY child questionnaire                                                                                                                                                                                                                                                                                                                                                                        | 0.64/0.09                                                                                                      |
| 21. I play sports often/sometimes/never                                                                                                                                                                                                                         | Added                                                                                                                                                                                                                                                                                                                                                                                             |                                                                                                                |
| 22a. Do you participate in sports in your free time?<br>22b. How many times per week do you do this sport?<br>22c. How many hours per day do you do this sport? (fill in all sports that you do, the number of times and number of hours per week in the table) | DOiT questionnaire (adapted)<br>Original:<br>1. 'Do you participate in a sport at a sports club?'<br>2. 'How many hours a week do you do this sport?'<br>3. 'Do you participate in a second sport at a sports club?'<br>4. 'How many hours a week do you do this second sport?'<br>5. 'Do you participate in sports outside a sports club?'<br>6. 'How many hours a week do you do these sports?' | 1. 0.98/0.86<br>2. 0.94/0.78<br>3. 0.79/0.69<br>4. 0.76/0.96<br>5. 0.64/0.33<br>6. 0.64/0.45                   |
| 23. About how many hours a day do you usually watch television/DVDs/movies on the tablet or iPad in your free time? (fill in the number of hours per day in table)                                                                                              | ENERGY child questionnaire (adapted)<br>Original: 'About how many hours a day do you usually watch television in your free time?' (weekdays and weekend days)                                                                                                                                                                                                                                     | Weekdays 0.67/0.63<br>Weekend days 0.68/0.56                                                                   |
| 24. About how many hours a day do you usually play games on your game computer, iPad, smartphone or surfing on the internet in your free time? (fill in the number of hours per day in table, weekdays and weekend days)                                        | ENERGY child questionnaire (adapted)<br>Original: 'About how many hours a day do you usually play games on a computer, or use your computer in your free time?' (weekdays and weekend days)                                                                                                                                                                                                       | Weekdays 0.67/0.35<br>Weekend days 0.67/0.65                                                                   |
| 25. How do you rate your health today?                                                                                                                                                                                                                          | Euroqol EQ-5D-Y Dutch                                                                                                                                                                                                                                                                                                                                                                             | 0.83/ -0.51                                                                                                    |

### Accelerometer

Physical activity and sedentary behaviour is objectively assessed by ActiGraph GT3X+ accelerometers. The children receive instructions and the accelerometers from an academic researcher after filling in the questionnaire. Children are asked to wear the small and light-

1  
2  
3 weight (4.6 x 3.3 x 1.5 cm; 19 grams) accelerometer on the right hip for eight consecutive  
4 days during all waking hours except for water-based activities.

5  
6 The children receive the accelerometer after completing the questionnaire. The children also  
7 receive a diary in which the instructions are summarized and they can write down when and  
8 why they did not wear the accelerometer, if applicable. Additionally, they are asked to write  
9 down the time they went to bed. All children who participate in the questionnaire- and  
10 accelerometer measurements receive a small present after returning the accelerometer.  
11 Additionally, at each school there is one prize for a participant who wore the accelerometer  
12 properly (seven days, at least ten hours) and recorded their data correctly in their diary.  
13 Data are downloaded from the accelerometers into the ActiLife programme in 15 second  
14 epochs. Accelerometer data is analysed using a customized software programme developed  
15 in R. For inclusion in the data analysis, each participant needs a minimum of six days with at  
16 least eight valid hours, including at least one weekend day<sup>34</sup>. Data is analysed on total time  
17 spent in MVPA and sedentary , and time in bouts spent in MVPA and sedentary.

#### 28 *MOPER*

29 Children's motor fitness is measured using the Motor Performance Test (MOPER). The  
30 MOPER tests speed, flexibility, endurance, coordination and strength by means of eight tests  
31<sup>35</sup>. For practical reasons, the arm pull and 12-minute endurance test have been replaced,  
32 leading to the following tests: 1) hang as long as possible on a horizontal bar with flexed  
33 arms; 2) jump as high as possible from a standing position; 3) run 10x5 meters as fast as  
34 possible; 4) reach as far as possible from a sitting position; 5) hand grip strength measured  
35 using a dynamometer<sup>36 37</sup>(instead of arm pull); 6) lie on their back and lift their extended  
36 legs ten times as fast as possible; 7) tap two plates which are 75 cm apart with the preferred  
37 hand 50 times as fast as possible; and 8) shuttle run test<sup>38 39</sup>(instead of 12-minute  
38 endurance test). Children can do tests one and eight once. Tests two and five are executed  
39 twice, but when the difference between one and two is more than 10%, a third try is  
40 performed. The highest score is used. The other tests are performed twice and the highest  
41 score is used. The first seven activities of the MOPER test are executed during one Physical  
42 Education (PE) class by the PE teacher together with five or six research assistants. The PE  
43 teacher conducts the shuttle run test in a separate PE class. All research assistants and PE  
44 teachers are trained by an academic researcher on how the tests should be executed. At the  
45  
46  
47  
48  
49  
50  
51  
52  
53  
54  
55  
56  
57  
58  
59  
60

1  
2  
3 end of the study, or when children from the highest grade leave the school, the PE teacher  
4 anonymously shares the results of the test. Parents receive an information letter with a  
5 passive consent form, which should be signed by at least one of the parents if they object to  
6 anonymously sharing the fitness test results of their child with the researchers.  
7  
8  
9

### 10 2.5.2. Process evaluation

11 The process evaluation includes the description of the process of co-creating interventions,  
12 combining IM and YPAR, and empowerment. The PAR process is continually evaluated in the  
13 Action Team meetings, and meetings are optimized in accordance with the evaluation<sup>21</sup>. The  
14 academic researcher and research assistant who are part of the Action Teams evaluate after  
15 every meeting, using a reflection form consisting of a summary of the meeting, what the  
16 setting was like, the group process and a personal reflection<sup>40-42</sup>.  
17  
18

19 The interventions are developed by combining the YPAR and IM methodologies in an  
20 iterative process and are continuously evaluated during the meetings of the Action Teams  
21 and with the children participating in the interventions. In collaboration with the Action  
22 Teams, it is determined how to evaluate the experiences of children with the interventions.  
23 The Action Teams can for example interview peers or develop a questionnaire. The goal of  
24 these evaluations is to see how their peers perceive the interventions and whether quick  
25 adaptations need to be made. At the end of each school year, focus groups are organized  
26 with children from both the Action Teams and their peers, as well as champions to reflect  
27 upon the implementation of ongoing interventions and on the empowerment process.  
28 Empowerment consists of a combination of individual, organizational, and community  
29 empowerment<sup>43</sup>. In our research, we mostly focus on the empowerment of children  
30 (individual), but this cannot be evaluated without taking the organizational (school) and  
31 community empowerment into account<sup>44</sup>. The focus groups consist of two exercises. The  
32 first exercise is mainly focused on individual empowerment, evaluating what children have  
33 learnt about the process of intervention development, how they see their role, and  
34 competences<sup>45 46</sup>. The children can choose an intervention idea which has not been further  
35 developed yet. For this intervention they have to make a timeline with all the steps they  
36 need to take from coming up with the idea through to implementation. The researchers  
37 guide them through questions, for example: in which order do the steps need to be written  
38 down?; do they think they can execute this step by themselves?; if not, do they know where  
39  
40  
41  
42  
43  
44  
45  
46  
47  
48  
49  
50  
51  
52  
53  
54  
55  
56  
57  
58  
59  
60

1  
2  
3 they can get help? <sup>45</sup>. The second exercise evaluates the organizational and community  
4 empowerment. In pairs, the children first indicate which changes happened at school or in  
5 the community; then they indicate whether children had any influence on the changes;  
6 finally, the findings are discussed in a plenary session. Again the researchers ask questions,  
7 for example: how do you feel when you have influence on changes in the  
8 community/school?; do you think children have enough influence?; would different changes  
9 have been made if children had had more influence? The findings of this focus group provide  
10 critical understanding of the environment, what children have learnt, to what extent  
11 children participate in the organizational setting and community, and what collective action  
12 has already been taken <sup>44-46</sup>.

21 Of all hard-copy research data gathered in the PAR meetings, identifiable information is  
22 removed and the data are stored in a locked cabinet at the research location until the study  
23 is completed. All online data are coded and stored on the VUmc protected drive until five  
24 years after the completion date of the study. Hard-copies of the questionnaires and the  
25 audio-recordings are also stored at the VUmc until five years after the study is completed.  
26 The three researchers on this project, who are also the authors of this paper, are the only  
27 ones who have full access to the trial data. Research assistants have limited access to copies  
28 of the data.

### 36 2.5.3. Sample size calculation

37 Using a significance level of 0.05 and a power of 0.80, 180 children per group are needed to  
38 detect a difference of 0.15SD in the primary outcome variables. With an estimation of 360  
39 eligible children in the intervention group and 360 in the control group, and a response rate  
40 of 2/3, 240 children per group participate. Taking into account drop-out, we expect to  
41 include data from 180 children per group in the analyses.

### 47 2.5.4. Data analysis

#### 48 *Effect evaluation*

49 To test for baseline differences in the dependent variables between control and intervention  
50 groups, t-test for continuous variables and chi-square tests for categorical variables are used.  
51 Effectiveness of the interventions on dietary behaviour, physical activity, sedentary  
52 behaviour, physical fitness and self-rated health is evaluated using multi-level regression  
53  
54  
55  
56  
57  
58  
59

1  
2  
3 analysis with a 3-level structure (i.e. student, class, school) to adjust for clustering of  
4 observations. Analyses are adjusted for age, gender, ethnicity and baseline levels. All  
5 statistical analysis is performed in SPSS, using a significance level of  $P < 0.05$ .  
6  
7

### 8 9 *Process evaluation*

10 Evaluation of the PAR process and its meetings are mainly performed by the Action Teams  
11 themselves. The academic researcher stimulates the children to find patterns and relations  
12 in the findings of their own research and assists in interpretation<sup>47</sup>. Children can for example  
13 look at the pictures they have taken and write down why they took the picture and what  
14 they want to say with the picture. Children can also write down the key issues that come up  
15 in the interviews they have conducted and see if they can identify a pattern. By giving  
16 children this role in qualitative data analysis, less misinterpretation of data occurs (than  
17 would be the case with adults trying to interpret the children's findings).  
18

19 In addition, all meetings are summarized and include field notes, and key meetings are fully  
20 transcribed<sup>40</sup>. The academic researcher analyses these transcripts to enrich the children's  
21 findings. When, for example, the children discuss the pictures they have taken, these  
22 discussions may also contain valuable information in addition to the pictures and conclusions  
23 of the children. All summaries and transcripts are coded in ATLAS.ti by two researchers to  
24 improve the reliability of the study. For the entire process evaluation, an elaborate coding  
25 scheme is produced through open coding<sup>47</sup>. For specific aspects like the evaluation of an  
26 intervention, coding is done separately resulting in its own coding scheme. For evaluations  
27 relating to empowerment, closed coding is used as this will be linked to a conceptual model.  
28  
29  
30  
31  
32  
33  
34  
35  
36  
37  
38  
39  
40  
41

## 42 **3. DISCUSSION**

43 In the Kids in Action project, children are involved throughout the entire research process.  
44 This YPAR approach has previously shown promising results for communities in need with  
45 respect to researchers' understanding of the community, lowering health disparities,  
46 increasing children's skills (e.g. research skills, life skills), critical awareness, involvement and  
47 empowerment concerning community action<sup>48-50</sup>.  
48  
49

50 In the Kids in Action project, children will not be involved in the first phase of this study, in  
51 which partnerships with other stakeholders in the community have to be set up. This is  
52 because creating partnerships can be time-consuming and not very interesting for children,  
53  
54  
55  
56  
57  
58  
59  
60



1  
2  
3 and we did not want to lower their spirits<sup>30</sup>. The partnerships are important in YPAR for  
4 creating support in the community for the study<sup>48 51</sup> and are beneficial in the rest of the  
5 research process and outcomes.  
6

7  
8 A difference between this study and most YPAR studies is that 9 – 12-year-old children are  
9 involved as co-researchers, whereas most YPAR studies collaborate with adolescents older  
10 than 12<sup>52</sup>. Younger children can be more easily distracted, have a limited attention span and  
11 might need more ‘play’, all of which should be taken into account when designing the  
12 meetings. Meetings should not be too long, should contain fun and playful exercises, and  
13 wording should be suitable for the children, while retaining key principles of YPAR. These  
14 principles include: sharing power between researchers and children; training children to  
15 participate in research and identify needs in their community; teaching children how to  
16 become advocates; creating ownership over the process; and creating involvement in  
17 establishing change in their community<sup>53</sup>. When all of this is done with care, children  
18 between 9 and 12 years old are capable of joining in YPAR research<sup>54-56</sup>.  
19  
20  
21  
22  
23  
24  
25  
26  
27

28 One implication of working with 9 – 12-year-old children is that you often have to  
29 collaborate intensively with the schools. This could mean that changes in the planning have  
30 to be made beforehand or during the project, based on the schools’ preferences, holidays  
31 and other reasons for cancelling meetings<sup>30</sup>. Also, the approval and assistance of schools  
32 and other community organizations are likely to be needed for implementing the  
33 interventions. Because this is a community project, all primary schools in the neighbourhood  
34 are included in the intervention and randomization of schools is not possible. However, the  
35 inclusion of comparable control schools is a strength of this study as this is seldom included  
36 in PAR<sup>57</sup>. Another strength of this study is the combination of YPAR with IM, which makes  
37 sure that evidence-based strategies are being applied. As far as we know, this has not been  
38 done before.  
39

40 A challenge for all intervention studies in real life is that other initiatives can also take place  
41 in the neighbourhood. This is part of usual care and can take place both in the intervention  
42 school and the control school neighbourhoods, and may dilute intervention effects.  
43  
44  
45  
46

## 47 **AUTHOR’S CONTRIBUTIONS**

48 All authors worked on the design of this study. MA is the coordinating researcher on the  
49  
50  
51  
52

project, coordinating the effect measurements, process evaluation, leading the participatory process and facilitating the Action Teams. TA and MC designed the study. The paper was drafted by MA, with MC and TA providing comments and revisions to drafts. All authors approved the final version.

## ACKNOWLEDGEMENT

The authors thank the children who participated in the Action Teams for their contribution to this study.

## STATEMENTS

This work is supported by FNO, grant number 101569.

The authors declare that they have no competing interests.

## REFERENCES

1. CBS. Ervaren gezondheid, zorggebruik en leefstijl bij kinderen tot 12 jaar 2016 [Available from: <http://statline.cbs.nl/Statweb/publication/?DM=SLNL&PA=83716NED&D1=89&D2=0&D3=I&D4=0&D5=2&VW=T> accessed 12-12 2017].
2. GGD. Gezondheid in beeld: GGD Amsterdam; 2016 [Available from: <https://amsterdam.ggdgezondheidinbeeld.nl/jeugd/> accessed 12-12 2017].
3. Gemeente Amsterdam. Staat van gezond gewicht en leefstijl van Amsterdamse kinderen, 2017:1-46.
4. Chi DL, Luu M, Chu F. A scoping review of epidemiologic risk factors for pediatric obesity: Implications for future childhood obesity and dental caries prevention research. *J Public Health Dent* 2017;77 Suppl 1:S8-S31. doi: 10.1111/jphd.12221
5. Kumanyika SK, Whitt-Glover MC, Haire-Joshu D. What works for obesity prevention and treatment in black Americans? Research directions. *Obes Rev* 2014;15 Suppl 4:204-12. doi: 10.1111/obr.12213
6. Wang Y, Lim H. The global childhood obesity epidemic and the association between socio-economic status and childhood obesity. *Int Rev Psychiatry* 2012;24(3):176-88. doi: 10.3109/09540261.2012.688195
7. Taveras EM, Gillman MW, Kleinman K, et al. Racial/ethnic differences in early-life risk factors for childhood obesity. *Pediatrics* 2010;125(4):686-95. doi: 10.1542/peds.2009-2100
8. Wang Y, Beydoun MA. The obesity epidemic in the United States--gender, age, socioeconomic, racial/ethnic, and geographic characteristics: a systematic review and meta-regression analysis. *Epidemiol Rev* 2007;29:6-28. doi: 10.1093/epirev/mxm007
9. CBS. Leefstijl en preventie; geslacht, leeftijd, persoonskenmerken 2016 [Available from: <http://statline.cbs.nl/Statweb/publication/?DM=SLNL&PA=83385ned&D1=11-15&D2=a&D3=a&D4=5-9&D5=0&D6=I&VW=T> accessed 12-12 2017].
10. Singh AS, Mulder C, Twisk JW, et al. Tracking of childhood overweight into adulthood: a systematic review of the literature. *Obes Rev* 2008;9(5):474-88. doi: 10.1111/j.1467-789X.2008.00475.x
11. Hirasing RA, Fredriks AM, van Buuren S, et al. [Increased prevalence of overweight and obesity in Dutch children, and the detection of overweight and obesity using international criteria and new reference diagrams]. *Ned Tijdschr Geneesk* 2001;145(27):1303-8.

12. Schonbeck Y, Talma H, van Dommelen P, et al. Increase in prevalence of overweight in Dutch children and adolescents: a comparison of nationwide growth studies in 1980, 1997 and 2009. *PLoS One* 2011;6(11):e27608. doi: 10.1371/journal.pone.0027608
13. Mead E, Brown T, Rees K, et al. Diet, physical activity and behavioural interventions for the treatment of overweight or obese children from the age of 6 to 11 years. *Cochrane Database Syst Rev* 2017;6:CD012651. doi: 10.1002/14651858.CD012651
14. Metcalf B, Henley W, Wilkin T. Effectiveness of intervention on physical activity of children: systematic review and meta-analysis of controlled trials with objectively measured outcomes (EarlyBird 54). *BMJ* 2012;345:e5888. doi: 10.1136/bmj.e5888
15. Lorenc T, Petticrew M, Welch V, et al. What types of interventions generate inequalities? Evidence from systematic reviews. *J Epidemiol Community Health* 2013;67(2):190-3. doi: 10.1136/jech-2012-201257
16. Chung A, Backholer K, Wong E, et al. Trends in child and adolescent obesity prevalence in economically advanced countries according to socioeconomic position: a systematic review. *Obes Rev* 2016;17(3):276-95. doi: 10.1111/obr.12360
17. Stamatakis E, Wardle J, Cole TJ. Childhood obesity and overweight prevalence trends in England: evidence for growing socioeconomic disparities. *Int J Obes (Lond)* 2010;34(1):41-7. doi: 10.1038/ijo.2009.217
18. Gittelsohn J, Anderson Steeves E, Mui Y, et al. B'More Healthy Communities for Kids: design of a multi-level intervention for obesity prevention for low-income African American children. *BMC Public Health* 2014;14:942. doi: 10.1186/1471-2458-14-942
19. Brown HE, Atkin AJ, Panter J, et al. Family-based interventions to increase physical activity in children: a systematic review, meta-analysis and realist synthesis. *Obes Rev* 2016;17(4):345-60. doi: 10.1111/obr.12362
20. Anselma M, Chinapaw MJM, Altenburg TM. Determinants of Child Health Behaviors in a Disadvantaged Area from a Community Perspective: A Participatory Needs Assessment. *Int J Environ Res Public Health* 2018;15(4) doi: 10.3390/ijerph15040644
21. Baum F, MacDougall C, Smith D. Participatory action research. *J Epidemiol Community Health* 2006;60(10):854-7. doi: 10.1136/jech.2004.028662
22. Rodriguez LF, Brown TM. From voice to agency: guiding principles for participatory action research with youth. *New Dir Youth Dev* 2009;2009(123):19-34, 11. doi: 10.1002/yd.312
23. Ozer EJ. Youth-Led Participatory Action Research: Developmental and Equity Perspectives. *Adv Child Dev Behav* 2016;50:189-207. doi: 10.1016/bs.acdb.2015.11.006
24. Cammarota J, & Fine, M. Youth Participatory Action Research. In: Cammarota J, & Fine, M., ed. Revolutionizing education. New York, United States of America: Routledge 2008:1-11.
25. London JK, Zimmerman, K. Erbstein, N. Youth-Led Research and Evaluation: Tools for Youth, Organizational, and Community Development. *NEW DIRECTIONS FOR EVALUATION* 2003(98):33-45.
26. Suleiman AB, Soleimanpour, S., London, J. Youth Action for Health Through Youth-Led Research. *Journal of Community Practice* 2006;14(1-2):125-45.
27. Municipality of Amsterdam. Bevolking buurten naar herkomstgroepering 2017 [Available from: <https://www.ois.amsterdam.nl/feiten-en-cijfers/buurten> accessed 05-02 2018.
28. GGD Amsterdam. Gezondheid in beeld [cited 2018 05-02]. Available from: <https://amsterdam.ggdgezondheidinbeeld.nl/>.
29. Municipality of Amsterdam. Gebiedsanalyse 2017 Noord West Stadsdeel Noord 2017 [Available from: [https://www.ois.amsterdam.nl/pdf/2017\\_gebiedsanalyse\\_17.pdf](https://www.ois.amsterdam.nl/pdf/2017_gebiedsanalyse_17.pdf) accessed 05-02 2018.
30. Suleiman AB, Soleimanpour S, London J. Youth Action for Health Through Youth-Led Research. *Journal of Community Practice* 2006;14(1-2):125-45. doi: 10.1300/J125v14n01\_08
31. Singh AS, Vik FN, Chinapaw MJ, et al. Test-retest reliability and construct validity of the ENERGY-child questionnaire on energy balance-related behaviours and their potential determinants: the ENERGY-project. *Int J Behav Nutr Phys Act* 2011;8:136. doi: 10.1186/1479-5868-8-136

- 1  
2  
3 32. Janssen EH, Singh AS, van Nassau F, et al. Test-retest reliability and construct validity of the DOI-T  
4 (Dutch Obesity Intervention in Teenagers) questionnaire: measuring energy balance-related  
5 behaviours in Dutch adolescents. *Public Health Nutr* 2014;17(2):277-86. doi:  
6 10.1017/S1368980012005253
- 7 33. Ravens-Sieberer U, Wille N, Badia X, et al. Feasibility, reliability, and validity of the EQ-5D-Y:  
8 results from a multinational study. *Qual Life Res* 2010;19(6):887-97. doi: 10.1007/s11136-  
9 010-9649-x
- 10 34. Chinapaw MJ, de Niet M, Verloigne M, et al. From sedentary time to sedentary patterns:  
11 accelerometer data reduction decisions in youth. *PLoS One* 2014;9(11):e111205. doi:  
12 10.1371/journal.pone.0111205
- 13 35. Leyten C, Kemper, H.C.G., Verschuur, R. De moper fitheidstest: handleiding en prestatieschalen 9  
14 t/m 11 jarigen. Haarlem: BV Uitgeverij De Vrieseborch 1982.
- 15 36. Molenaar HM, Zuidam JM, Selles RW, et al. Age-specific reliability of two grip-strength  
16 dynamometers when used by children. *J Bone Joint Surg Am* 2008;90(5):1053-9. doi:  
17 10.2106/JBJS.G.00469
- 18 37. Hamilton GF, McDonald C, Chenier TC. Measurement of grip strength: validity and reliability of  
19 the sphygmomanometer and jamar grip dynamometer. *J Orthop Sports Phys Ther*  
20 1992;16(5):215-9. doi: 10.2519/jospt.1992.16.5.215
- 21 38. Matsuzaka A, Takahashi Y, Yamazoe M, et al. Validity of the Multistage 20-M Shuttle-Run Test for  
22 Japanese Children, Adolescents, and Adults 2004.
- 23 39. Liu NYS, Plowman SA, Looney MA. The Reliability and Validity of the 20-Meter Shuttle Test in  
24 American Students 12 to 15 Years Old. *Research Quarterly for Exercise and Sport*  
25 1992;63(4):360-65. doi: 10.1080/02701367.1992.10608757
- 26 40. Halcomb EJ, Gholizadeh L, DiGiacomo M, et al. Literature review: considerations in undertaking  
27 focus group research with culturally and linguistically diverse groups. *Journal of Clinical*  
28 *Nursing* 2007;16(6):1000-11. doi: 10.1111/j.1365-2702.2006.01760.x
- 29 41. Rabiee F. Focus-group interview and data analysis. *Proc Nutr Soc* 2004;63(4):655-60.
- 30 42. Marshall J, Mead G. Editorial: Self-reflective practice and first-person action research. *Action*  
31 *research* 2005;3(3):235-44. doi: 10.1177/1476750305055999
- 32 43. Israel BA, Checkoway B, Schulz A, et al. Health education and community empowerment:  
33 conceptualizing and measuring perceptions of individual, organizational, and community  
34 control. *Health Educ Q* 1994;21(2):149-70.
- 35 44. Zimmerman M. Empowerment Theory 2012.
- 36 45. Perkins DD, Zimmerman MA. Empowerment theory, research, and application. *Am J Community*  
37 *Psychol* 1995;23(5):569-79.
- 38 46. Zimmerman MA, Israel BA, Schulz A, et al. Further Explorations in Empowerment Theory: An  
39 Empirical Analysis of Psychological Empowerment. *American Journal of Community*  
40 *Psychology* 1992;20(6):707-27.
- 41 47. Corbin J, Strauss A. Grounded Theory Research: Procedures, Canons, and Evaluative Criteria.  
42 *Qualitative Sociology* 1990;13(1):3-21. doi: <https://doi.org/10.1007/BF00988593>
- 43 48. Berg M, Coman E, Schensul JJ. Youth Action Research for Prevention: a multi-level intervention  
44 designed to increase efficacy and empowerment among urban youth. *Am J Community*  
45 *Psychol* 2009;43(3-4):345-59. doi: 10.1007/s10464-009-9231-2
- 46 49. Foster-Fishman PG, Law KM, Lichty LF, et al. Youth ReACT for Social Change: a method for youth  
47 participatory action research. *Am J Community Psychol* 2010;46(1-2):67-83. doi:  
48 10.1007/s10464-010-9316-y
- 49 50. Checkoway B, Allison T, Montoya C. Youth participation in public policy at the municipal level.  
50 *Children and Youth Services Review* 2005;27:1149-62. doi: 10.1016/j.childyouth.2005.01.001
- 51 51. Oen G, Stormark KM. Participatory action research in the implementing process of evidence-  
52 based intervention to prevent childhood obesity: project design of the "Healthy Future"  
53 study. *J Obes* 2013;2013:437206. doi: 10.1155/2013/437206
- 54  
55  
56  
57  
58  
59  
60

- 1  
2  
3 52. Kim J. Youth Involvement in Participatory Action Research (PAR): Challenges and Barriers. *Critical*  
4 *Social Work* 2016;17(1):38-53.  
5 53. Ozer EJ, Ritterman ML, Wanis MG. Participatory action research (PAR) in middle school:  
6 opportunities, constraints, and key processes. *Am J Community Psychol* 2010;46(1-2):152-66.  
7 doi: 10.1007/s10464-010-9335-8  
8 54. Caro HE, Altenburg TM, Dedding C, et al. Dutch Primary Schoolchildren's Perspectives of Activity-  
9 Friendly School Playgrounds: A Participatory Study. *Int J Environ Res Public Health* 2016;13(6)  
10 doi: 10.3390/ijerph13060526  
11 55. Wang CC. Youth Participation in Photovoice as a Strategy for Community Change. *Journal of*  
12 *Community Practice* 2006;14(1-2):147-61. doi: 10.1300/J125v14n01\_09  
13 56. Wilson N, Dasho S, Martin AC, et al. Engaging Young Adolescents in Social Action Through  
14 Photovoice. *Journal of Early Adolescence* 2007;27(2):241-61. doi:  
15 10.1177/0272431606294834  
16 57. Leykum LK, Pugh JA, Lanham HJ, et al. Implementation research design: integrating participatory  
17 action research into randomized controlled trials. *Implement Sci* 2009;4:69. doi:  
18 10.1186/1748-5908-4-69  
19  
20  
21  
22  
23  
24  
25  
26  
27  
28  
29  
30  
31  
32  
33  
34  
35  
36  
37  
38  
39  
40  
41  
42  
43  
44  
45  
46  
47  
48  
49  
50  
51  
52  
53  
54  
55  
56  
57  
58  
59  
60

## FIGURE AND TABLE TITLES

Figure 1: Outline of the 'Kids in Action' project

Table 1: Questionnaire items, their origin, and reliability and validity

For peer review only

1  
2  
3  
4  
5  
6  
7  
8  
9  
10  
11  
12  
13  
14  
15  
16  
17  
18  
19  
20  
21  
22  
23  
24  
25  
26  
27  
28  
29  
30  
31  
32  
33  
34  
35  
36  
37  
38  
39  
40  
41  
42  
43  
44  
45  
46  
47  
48  
49  
50  
51  
52  
53  
54  
55  
56  
57  
58  
59  
60

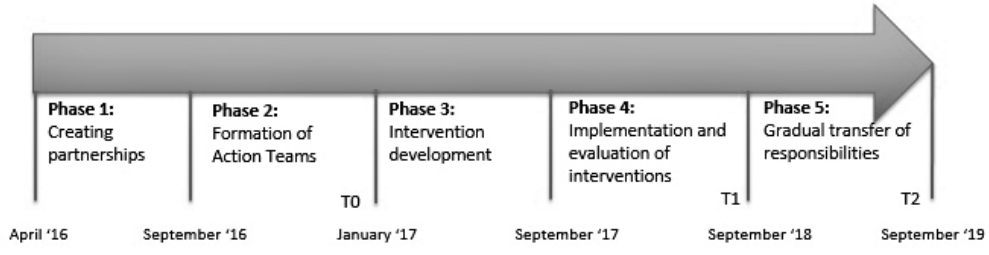

**Continuous activities**

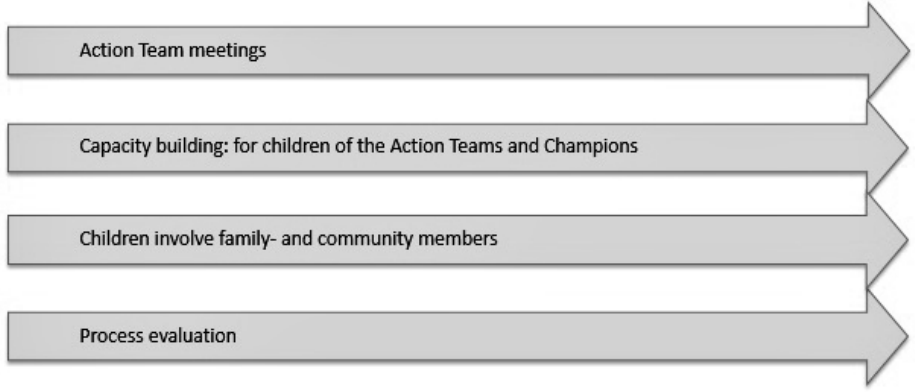

Outline of the 'Kids in Action' project

55x42mm (300 x 300 DPI)

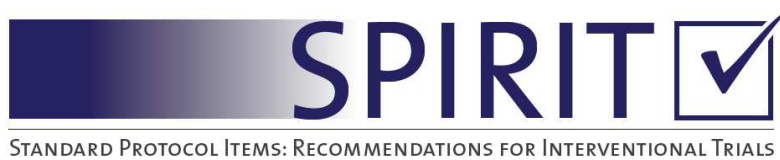

SPIRIT 2013 Checklist: Recommended items to address in a clinical trial protocol and related documents\*

| Section/item                      | Item No | Description                                                                                                                                                                                                                                                                              |
|-----------------------------------|---------|------------------------------------------------------------------------------------------------------------------------------------------------------------------------------------------------------------------------------------------------------------------------------------------|
| <b>Administrative information</b> |         |                                                                                                                                                                                                                                                                                          |
| Title                             | 1       | Descriptive title identifying the study design, population, interventions, and, if applicable, trial acronym                                                                                                                                                                             |
| Trial registration                | 2a      | Trial identifier and registry name. If not yet registered, name of intended registry                                                                                                                                                                                                     |
|                                   | 2b      | All items from the World Health Organization Trial Registration Data Set                                                                                                                                                                                                                 |
| Protocol version                  | 3       | Date and version identifier                                                                                                                                                                                                                                                              |
| Funding                           | 4       | Sources and types of financial, material, and other support                                                                                                                                                                                                                              |
| Roles and responsibilities        | 5a      | Names, affiliations, and roles of protocol contributors                                                                                                                                                                                                                                  |
|                                   | 5b      | Name and contact information for the trial sponsor                                                                                                                                                                                                                                       |
|                                   | 5c      | Role of study sponsor and funders, if any, in study design; collection, management, analysis, and interpretation of data; writing of the report; and the decision to submit the report for publication, including whether they will have ultimate authority over any of these activities |
|                                   | 5d      | Composition, roles, and responsibilities of the coordinating centre, steering committee, endpoint adjudication committee, data management team, and other individuals or groups overseeing the trial, if applicable (see Item 21a for data monitoring committee)                         |
| <b>Introduction</b>               |         |                                                                                                                                                                                                                                                                                          |
| Background and rationale          | 6a      | Description of research question and justification for undertaking the trial, including summary of relevant studies (published and unpublished) examining benefits and harms for each intervention                                                                                       |
|                                   | 6b      | Explanation for choice of comparators                                                                                                                                                                                                                                                    |
| Objectives                        | 7       | Specific objectives or hypotheses                                                                                                                                                                                                                                                        |
| Trial design                      | 8       | Description of trial design including type of trial (eg, parallel group, crossover, factorial, single group), allocation ratio, and framework (eg, superiority, equivalence, noninferiority, exploratory)                                                                                |



## Methods: Participants, interventions, and outcomes

|                      |     |                                                                                                                                                                                                                                                                                                                                                                                |
|----------------------|-----|--------------------------------------------------------------------------------------------------------------------------------------------------------------------------------------------------------------------------------------------------------------------------------------------------------------------------------------------------------------------------------|
| Study setting        | 9   | Description of study settings (eg, community clinic, academic hospital) and list of countries where data will be collected. Reference to where list of study sites can be obtained                                                                                                                                                                                             |
| Eligibility criteria | 10  | Inclusion and exclusion criteria for participants. If applicable, eligibility criteria for study centres and individuals who will perform the interventions (eg, surgeons, psychotherapists)                                                                                                                                                                                   |
| Interventions        | 11a | Interventions for each group with sufficient detail to allow replication, including how and when they will be administered                                                                                                                                                                                                                                                     |
|                      | 11b | Criteria for discontinuing or modifying allocated interventions for a given trial participant (eg, drug dose change in response to harms, participant request, or improving/worsening disease)                                                                                                                                                                                 |
|                      | 11c | Strategies to improve adherence to intervention protocols, and any procedures for monitoring adherence (eg, drug tablet return, laboratory tests)                                                                                                                                                                                                                              |
|                      | 11d | Relevant concomitant care and interventions that are permitted or prohibited during the trial                                                                                                                                                                                                                                                                                  |
| Outcomes             | 12  | Primary, secondary, and other outcomes, including the specific measurement variable (eg, systolic blood pressure), analysis metric (eg, change from baseline, final value, time to event), method of aggregation (eg, median, proportion), and time point for each outcome. Explanation of the clinical relevance of chosen efficacy and harm outcomes is strongly recommended |
| Participant timeline | 13  | Time schedule of enrolment, interventions (including any run-ins and washouts), assessments, and visits for participants. A schematic diagram is highly recommended (see Figure)                                                                                                                                                                                               |
| Sample size          | 14  | Estimated number of participants needed to achieve study objectives and how it was determined, including clinical and statistical assumptions supporting any sample size calculations                                                                                                                                                                                          |
| Recruitment          | 15  | Strategies for achieving adequate participant enrolment to reach target sample size                                                                                                                                                                                                                                                                                            |

## Methods: Assignment of interventions (for controlled trials)

### Allocation:

|                     |     |                                                                                                                                                                                                                                                                                                                                                          |
|---------------------|-----|----------------------------------------------------------------------------------------------------------------------------------------------------------------------------------------------------------------------------------------------------------------------------------------------------------------------------------------------------------|
| Sequence generation | 16a | Method of generating the allocation sequence (eg, computer-generated random numbers), and list of any factors for stratification. To reduce predictability of a random sequence, details of any planned restriction (eg, blocking) should be provided in a separate document that is unavailable to those who enrol participants or assign interventions |
|---------------------|-----|----------------------------------------------------------------------------------------------------------------------------------------------------------------------------------------------------------------------------------------------------------------------------------------------------------------------------------------------------------|

|    |                |     |                                                                         |
|----|----------------|-----|-------------------------------------------------------------------------|
| 1  |                |     |                                                                         |
| 2  | Allocation     | 16b | Mechanism of implementing the allocation sequence (eg, central          |
| 3  | concealment    |     | telephone; sequentially numbered, opaque, sealed envelopes),            |
| 4  | mechanism      |     | describing any steps to conceal the sequence until interventions are    |
| 5  |                |     | assigned                                                                |
| 6  |                |     |                                                                         |
| 7  | Implementation | 16c | Who will generate the allocation sequence, who will enrol participants, |
| 8  |                |     | and who will assign participants to interventions                       |
| 9  |                |     |                                                                         |
| 10 | Blinding       | 17a | Who will be blinded after assignment to interventions (eg, trial        |
| 11 | (masking)      |     | participants, care providers, outcome assessors, data analysts), and    |
| 12 |                |     | how                                                                     |
| 13 |                |     |                                                                         |
| 14 |                | 17b | If blinded, circumstances under which unblinding is permissible, and    |
| 15 |                |     | procedure for revealing a participant's allocated intervention during   |
| 16 |                |     | the trial                                                               |
| 17 |                |     |                                                                         |

### 18 **Methods: Data collection, management, and analysis**

|    |                 |     |                                                                          |
|----|-----------------|-----|--------------------------------------------------------------------------|
| 19 |                 |     |                                                                          |
| 20 | Data collection | 18a | Plans for assessment and collection of outcome, baseline, and other      |
| 21 | methods         |     | trial data, including any related processes to promote data quality (eg, |
| 22 |                 |     | duplicate measurements, training of assessors) and a description of      |
| 23 |                 |     | study instruments (eg, questionnaires, laboratory tests) along with      |
| 24 |                 |     | their reliability and validity, if known. Reference to where data        |
| 25 |                 |     | collection forms can be found, if not in the protocol                    |
| 26 |                 |     |                                                                          |
| 27 |                 |     |                                                                          |
| 28 |                 | 18b | Plans to promote participant retention and complete follow-up,           |
| 29 |                 |     | including list of any outcome data to be collected for participants who  |
| 30 |                 |     | discontinue or deviate from intervention protocols                       |
| 31 |                 |     |                                                                          |
| 32 | Data            | 19  | Plans for data entry, coding, security, and storage, including any       |
| 33 | management      |     | related processes to promote data quality (eg, double data entry;        |
| 34 |                 |     | range checks for data values). Reference to where details of data        |
| 35 |                 |     | management procedures can be found, if not in the protocol               |
| 36 |                 |     |                                                                          |
| 37 | Statistical     | 20a | Statistical methods for analysing primary and secondary outcomes.        |
| 38 | methods         |     | Reference to where other details of the statistical analysis plan can be |
| 39 |                 |     | found, if not in the protocol                                            |
| 40 |                 |     |                                                                          |
| 41 |                 |     |                                                                          |
| 42 |                 | 20b | Methods for any additional analyses (eg, subgroup and adjusted           |
| 43 |                 |     | analyses)                                                                |
| 44 |                 |     |                                                                          |
| 45 |                 | 20c | Definition of analysis population relating to protocol non-adherence     |
| 46 |                 |     | (eg, as randomised analysis), and any statistical methods to handle      |
| 47 |                 |     | missing data (eg, multiple imputation)                                   |
| 48 |                 |     |                                                                          |

### 49 **Methods: Monitoring**

|    |                 |     |                                                                      |
|----|-----------------|-----|----------------------------------------------------------------------|
| 50 |                 |     |                                                                      |
| 51 | Data monitoring | 21a | Composition of data monitoring committee (DMC); summary of its role  |
| 52 |                 |     | and reporting structure; statement of whether it is independent from |
| 53 |                 |     | the sponsor and competing interests; and reference to where further  |
| 54 |                 |     | details about its charter can be found, if not in the protocol.      |
| 55 |                 |     | Alternatively, an explanation of why a DMC is not needed             |
| 56 |                 |     |                                                                      |
| 57 |                 |     |                                                                      |
| 58 |                 |     |                                                                      |
| 59 |                 |     |                                                                      |
| 60 |                 |     |                                                                      |

|          |     |                                                                                                                                                                                   |
|----------|-----|-----------------------------------------------------------------------------------------------------------------------------------------------------------------------------------|
|          | 21b | Description of any interim analyses and stopping guidelines, including who will have access to these interim results and make the final decision to terminate the trial           |
| Harms    | 22  | Plans for collecting, assessing, reporting, and managing solicited and spontaneously reported adverse events and other unintended effects of trial interventions or trial conduct |
| Auditing | 23  | Frequency and procedures for auditing trial conduct, if any, and whether the process will be independent from investigators and the sponsor                                       |

### **Ethics and dissemination**

|                               |     |                                                                                                                                                                                                                                                                                     |
|-------------------------------|-----|-------------------------------------------------------------------------------------------------------------------------------------------------------------------------------------------------------------------------------------------------------------------------------------|
| Research ethics approval      | 24  | Plans for seeking research ethics committee/institutional review board (REC/IRB) approval                                                                                                                                                                                           |
| Protocol amendments           | 25  | Plans for communicating important protocol modifications (eg, changes to eligibility criteria, outcomes, analyses) to relevant parties (eg, investigators, REC/IRBs, trial participants, trial registries, journals, regulators)                                                    |
| Consent or assent             | 26a | Who will obtain informed consent or assent from potential trial participants or authorised surrogates, and how (see Item 32)                                                                                                                                                        |
|                               | 26b | Additional consent provisions for collection and use of participant data and biological specimens in ancillary studies, if applicable                                                                                                                                               |
| Confidentiality               | 27  | How personal information about potential and enrolled participants will be collected, shared, and maintained in order to protect confidentiality before, during, and after the trial                                                                                                |
| Declaration of interests      | 28  | Financial and other competing interests for principal investigators for the overall trial and each study site                                                                                                                                                                       |
| Access to data                | 29  | Statement of who will have access to the final trial dataset, and disclosure of contractual agreements that limit such access for investigators                                                                                                                                     |
| Ancillary and post-trial care | 30  | Provisions, if any, for ancillary and post-trial care, and for compensation to those who suffer harm from trial participation                                                                                                                                                       |
| Dissemination policy          | 31a | Plans for investigators and sponsor to communicate trial results to participants, healthcare professionals, the public, and other relevant groups (eg, via publication, reporting in results databases, or other data sharing arrangements), including any publication restrictions |
|                               | 31b | Authorship eligibility guidelines and any intended use of professional writers                                                                                                                                                                                                      |
|                               | 31c | Plans, if any, for granting public access to the full protocol, participant-level dataset, and statistical code                                                                                                                                                                     |

## Appendices

|                            |    |                                                                                                                                                                                                |
|----------------------------|----|------------------------------------------------------------------------------------------------------------------------------------------------------------------------------------------------|
| Informed consent materials | 32 | Model consent form and other related documentation given to participants and authorised surrogates                                                                                             |
| Biological specimens       | 33 | Plans for collection, laboratory evaluation, and storage of biological specimens for genetic or molecular analysis in the current trial and for future use in ancillary studies, if applicable |

---

\*It is strongly recommended that this checklist be read in conjunction with the SPIRIT 2013 Explanation & Elaboration for important clarification on the items. Amendments to the protocol should be tracked and dated. The SPIRIT checklist is copyrighted by the SPIRIT Group under the Creative Commons "[Attribution-NonCommercial-NoDerivs 3.0 Unported](#)" license.

# BMJ Open

## Kids in Action: The protocol of a Youth Participatory Action Research project to promote physical activity and dietary behaviour

|                                 |                                                                                                                                                                                                                                                                                        |
|---------------------------------|----------------------------------------------------------------------------------------------------------------------------------------------------------------------------------------------------------------------------------------------------------------------------------------|
| Journal:                        | <i>BMJ Open</i>                                                                                                                                                                                                                                                                        |
| Manuscript ID                   | bmjopen-2018-025584.R1                                                                                                                                                                                                                                                                 |
| Article Type:                   | Protocol                                                                                                                                                                                                                                                                               |
| Date Submitted by the Author:   | 07-Feb-2019                                                                                                                                                                                                                                                                            |
| Complete List of Authors:       | Anselma, Manou; Amsterdam UMC, Vrije Universiteit Amsterdam, Public and Occupational Health<br>Altenburg, T; Amsterdam UMC, Vrije Universiteit Amsterdam, Public and Occupational Health<br>Chinapaw, Mai; Amsterdam UMC, Vrije Universiteit Amsterdam, Public and Occupational Health |
| <b>Primary Subject Heading</b>: | Public health                                                                                                                                                                                                                                                                          |
| Secondary Subject Heading:      | Qualitative research, Sports and exercise medicine, Nutrition and metabolism                                                                                                                                                                                                           |
| Keywords:                       | Youth participatory action research, Deprived neighbourhood, Physical activity, Dietary behaviour                                                                                                                                                                                      |
|                                 |                                                                                                                                                                                                                                                                                        |

SCHOLARONE™  
Manuscripts

1  
2  
3  
4  
5 **Kids in Action: The protocol of a Youth Participatory Action Research project**  
6 **to promote physical activity and dietary behaviour**  
7  
8  
9

10 Manou Anselma

11 Department of Public and Occupational Health, Amsterdam Public Health Research Institute,  
12 VU University Medical Center, van der Boechorststraat 7, 1081 BT Amsterdam, The  
13 Netherlands; E: m.anselma@vumc.nl; Tel.: +31-205-611-240  
14  
15

16 Teatske M. Altenburg

17 Department of Public and Occupational Health, Amsterdam Public Health Research Institute,  
18 VU University Medical Center, Amsterdam, The Netherlands  
19

20 Mai J. M. Chinapaw

21 Department of Public and Occupational Health, Amsterdam Public Health Research Institute,  
22 VU University Medical Center, Amsterdam, The Netherlands  
23  
24  
25  
26  
27  
28  
29  
30  
31  
32  
33  
34  
35  
36  
37  
38  
39  
40  
41  
42  
43  
44  
45  
46  
47  
48  
49  
50  
51  
52  
53  
54  
55

56 Word count: 4791  
57  
58  
59  
60

## Kids in Action: The protocol of a Youth Participatory Action Research project to promote physical activity and dietary behaviour

Manou Anselma\*, Teatske M. Altenburg, and Mai J. M. Chinapaw

Department of Public and Occupational Health, Amsterdam Public Health Research Institute, VU University Medical Center, van der Boechorststraat 7, 1081 BT Amsterdam, The Netherlands; t.altenburg@vumc.nl (T.A.); m.chinapaw@vumc.nl (M.C.)

\* Correspondence: m.anselma@vumc.nl (M.A.); Tel.: +31-205-611-240

### ABSTRACT

**Introduction** In this study, researchers collaborate with children from a deprived neighbourhood in Amsterdam in developing, implementing and evaluating interventions targeting their health behaviours. This Youth Participatory Action Research (YPAR) project focuses on the promotion of physical activity and healthy dietary behaviour.

**Methods and analysis** This study is a controlled trial using participatory methods to develop interventions together with 9 - 12-year-old children. At four primary schools in a deprived neighbourhood in Amsterdam an 'Action Team' is installed: a group of six to eight children who actively participate as co-researchers in developing, implementing and evaluating interventions. An academic researcher facilitates the participatory process. Four control schools, also located in deprived areas in and around Amsterdam, continue with their regular curriculum and do not participate in the participatory process. For the effect evaluation, physical activity and sedentary behaviour is assessed using: accelerometers and self-reporting; dietary behaviour using self-reporting; and motor fitness (strength, flexibility, coordination, speed, endurance) using the MOPER fitness test. Effectiveness of the interventions is evaluated by multi-level regression analysis. The process of co-creating interventions and the implemented interventions is continually evaluated during meetings of the Action Teams and with children participating in the interventions. Empowerment of children is evaluated during focus groups. Summaries and transcripts of meetings are coded and analysed to enrich children's findings.

**Ethics and dissemination** The Medical Ethics Committee of the VU Medical Center approved the study protocol (2016.366).

**Protocol registration** The study protocol has been registered at the Dutch trial registration [www.trialregister.nl](http://www.trialregister.nl) under number TC=6604.

#### Strengths and limitations of this study :

- This study is the first to combine Youth Participatory Action Research (YPAR) with Intervention Mapping (IM), ensuring that the development interventions are both evidence-based and matching the interests and needs of the specific target group.
- The study design is a controlled trial, which is unique in YPAR.
- This study is embedded in the community involving a multidisciplinary project group. This aids the sustainability of the interventions.
- This study includes an effect evaluation as well as a process evaluation in which the YPAR process and empowerment of youth is evaluated.
- Randomization of schools into the intervention and control group is not possible because of the community approach.

## 1. INTRODUCTION

The number of children with overweight or obesity is growing worldwide and this public health problem is high on municipal and governmental agendas. This is no different in the Netherlands, where in 2016 on average there were 10.7% of the children between 8 and 12 years old with overweight/obesity <sup>1</sup>. In urban areas such as Amsterdam, the rates exceed the country's average, with prevalence rates of overweight/obesity of 12.8% among 5-year-olds and 20.9% among 10-year olds <sup>2</sup>. Even though the overweight numbers are stabilizing, health inequalities still exist <sup>3</sup>: children with overweight or obesity are not only disproportionately divided geographically, but also across income and ethnic groups <sup>4-6</sup>. Looking at race/ethnicity, children from minority groups show higher overweight/obesity rates than children from a majority group <sup>4 7 8</sup>. For example, in Amsterdam 10.4% of 5-year-old children with a Dutch ethnicity have overweight while this is almost 30% in 10-year-old children with a non-Western background <sup>3</sup>. In relation to income groups, in the Netherlands in the age category 4 - 25-year-olds, 11.2% of the highest income group had overweight, versus 18.0% of the lowest income group <sup>9</sup>. Similarly, in 2017 in Amsterdam 30.1% of the 10-year-old children with a very low socioeconomic status (SES) had overweight, versus 9.8% of the 10-year old children with a very high SES<sup>3</sup>. Importantly, children with overweight are at high risk of remaining overweight and are therefore also at higher risk for chronic illnesses during childhood and in their adult life <sup>10</sup>. This is why prevention of overweight in children is a priority for many health organizations, municipalities and ministries <sup>11 12</sup>.

Many interventions have been developed and implemented to prevent childhood obesity, but most show disappointing effects <sup>13 14</sup>. Pivotal in childhood obesity prevention is improving dietary behaviour, physical activity and sedentary behaviour <sup>15 16</sup>, but this is challenging <sup>17-19</sup>. Strikingly, the most affected group of children – i.e. from families with a low SES and from non-Western backgrounds – is most difficult to reach through interventions <sup>20</sup>, thereby maintaining or even widening health inequalities <sup>21 22</sup>. One reason why these interventions show low participation and effectiveness in this target group could be because the target group is seldom involved in the development of the interventions <sup>23</sup>. Involving the target group is essential to connect to their needs and interests <sup>24</sup>, as this influences the reach and effectiveness of the intervention. Therefore, in the current research project – 'Kids in Action' – children from a deprived neighbourhood are engaged as co-researchers, i.e.



1  
2  
3 applying Youth Participatory Action Research (YPAR). Children not only co-create  
4 interventions to improve their lifestyle and that of their peers and family members, but also  
5 collaborate in the implementation and evaluation of these interventions. To structure this  
6 process, the systematic Intervention Mapping (IM) methodology is applied alongside YPAR.  
7 Through six iterative steps the IM protocol guides health promoters in the development of  
8 evidence-based interventions to change behaviour<sup>25 26</sup>. Combining IM and YPAR ensures  
9 that the co-created interventions are appropriate to the interests and needs of the children,  
10 but also build on existing evidence. The application of IM alongside YPAR is a novel approach  
11 which we iteratively shape during this study.

### 20 1.1. Aims and objectives

21  
22  
23 The overall aim of the 'Kids in Action' study (April 2016-November 2019) is to develop,  
24 implement and evaluate interventions that stimulate a healthy lifestyle to reduce health  
25 inequalities in children from a low SES neighbourhood in collaboration with the children  
26 themselves. This study builds on a participatory needs assessment that was conducted in the  
27 same neighbourhood<sup>27</sup>. From this needs assessment, two main needs were identified: to  
28 improve physical activity and a healthy diet. The organized activities should be offered at a  
29 low price and at a nearby location, the education concerning a healthy diet should be  
30 organized in a fun and practical manner.

31  
32  
33 The primary objective of this study is to evaluate whether designing interventions in  
34 collaboration with children can lead to interventions that are more effective in improving  
35 children's physical activity and dietary behaviour.

36  
37  
38 The secondary objective of this study is to evaluate the process of combining YPAR with IM.  
39 This includes evaluating the effects of participating in the YPAR process on the  
40 empowerment of children and the judgement of children and other stakeholders of  
41 interventions that were co-developed by their peers.

## 52 2. METHODS

53  
54 The Medical Ethics Committee of the VU University Medical Center approved the study  
55 protocol (2016.366).

## 2.1. Participatory Action Research

Participatory Action Research (PAR) aims to 'improve health and reduce health inequities' by working together with the community and consequently empowering the community by getting them to improve their own health<sup>28</sup>. Throughout the entire process of developing, implementing and evaluating interventions, community members are involved as co-researchers and highly valued as experts of their own lives and experiences. At the same time, the community is empowered and experiences more ownership over their lives and livelihood.

This study specifically works together with children in the PAR process. YPAR engages youth as co-researchers in the research process. In this process, children identify problems in their living environment and become empowered to do something about it<sup>29-32</sup>. Children learn research skills so they can participate in research and have shared power over the research- and decision-making processes<sup>30 32 33</sup>.

## 2.2. Patient and public involvement

This study is initiated by academic researchers and a community organization. The municipality advises on the selection of the intervention neighbourhood, to recruit a neighbourhood with high health needs that can benefit from the project. As this study is informed by a participatory needs assessment (see section 1.1)<sup>27</sup>, the objectives and outcome measures of this study are determined in collaboration with children, parents and professionals working with children in the neighbourhood. The design of the study and recruitment procedures are decided by the academic researchers. The conduct of the study, the development of interventions and the dissemination of the results to the study participants and other relevant stakeholders, is decided together with the children.

## 2.3. Participants

The four intervention schools are all situated in one deprived neighbourhood in Amsterdam, where in 2015-2016 over 50% of the residents had a non-Western background, 27% of the 10-year-olds were overweight/obese and in 2014 31% of the children under 18 years old grew up in a household defined as low-income<sup>34-36</sup>. Potential control schools are selected from different neighbourhoods but with similar characteristics regarding overweight/obesity rates, household income and cultural background.

Participants in this study are children from four intervention schools and four control schools

1  
2  
3 in deprived neighbourhoods in Amsterdam, the Netherlands. The intervention schools  
4 participate in the YPAR process, including implementing and evaluating the developed  
5 interventions. The control schools only participate in the measurements for the effect  
6 evaluation.  
7  
8  
9

### 10 11 **2.3.1. Recruitment**

12 Following selection of a neighbourhood with high health needs, the intervention schools are  
13 contacted by the municipality to inform them about the project and to ask them if they are  
14 willing to participate. After the schools agree to participate, the main researcher contacts  
15 the schools to give them more information about the project. Control schools in the area of  
16 Amsterdam are contacted by the main researcher in a random order via e-mail or telephone  
17 until four schools are found that are willing to participate as control schools. Control schools  
18 are offered a presentation about the research results after the study is finished.  
19  
20  
21  
22  
23  
24  
25

26 All 9 - 12-year-old children (i.e. children of the three highest grades in primary school) of the  
27 four intervention and four control schools are eligible to participate in the effect  
28 measurements of the project. For the YPAR process, children from intervention schools are  
29 invited to collaborate with academic researchers in co-researcher groups, named 'Action  
30 Teams'. At each of the four intervention schools one Action Team is formed. For both the  
31 effect measurements and the Action Teams, every year new children can participate as the  
32 highest grade leaves the school and new children enter the third-highest grade. All children  
33 receive an information letter for themselves and for their parents about the measurements  
34 and the Action Team. Attached to the information letters for parents is an informed consent  
35 letter that at least one of the parents has to sign if they agree to the participation of their  
36 child. At all schools, the researcher explains the project in all classes and encourages children  
37 to participate, before handing out the information letters. Children who participate in the  
38 measurements and/or in the Action Team receive a small gift.  
39  
40  
41  
42  
43  
44  
45  
46  
47  
48  
49  
50

### 51 **2.4. Procedures**

52 This section describes the five phases of the 'Kids in Action' project. See Figure 1 for an  
53 outline.  
54  
55  
56

#### 57 **Phase 1: Creating partnerships**

58 The first phase consists of creating partnerships with the schools and other stakeholders in  
59  
60

1  
2  
3 the area, such as social workers, organizers of after-school activities and the community  
4 centres. Together with these stakeholders, a project group is started that meets every three  
5 months to discuss running projects in the neighbourhood and how partners can collaborate.  
6  
7 In this phase, an IM expert group is also formed, to advise on how YPAR and IM should be  
8 combined throughout all phases of the study.  
9  
10  
11  
12

### 13 Phase 2: Formation of Action Teams

14  
15 In the second phase of the project, the Action Teams are formed. Each of the Action Teams  
16 consists of six to eight children, an academic researcher and a research assistant. Meetings  
17 with the principals of the four intervention schools are planned to decide upon recruitment  
18 methods for the Action Teams and to schedule the meetings. All interested 9-12-year-old  
19 children can sign up for the Action Teams. This approach may lead to bias as only children  
20 interested in health may sign up, but limits bias that would occur if teachers select the  
21 children for the Action Teams (i.e. only the high-performers might be selected).  
22  
23 Subsequently, the Action Teams are formed and a general outline of the meetings is  
24 developed. In this phase, the baseline effect measurement (T0) is executed.  
25  
26  
27  
28  
29  
30  
31  
32

### 33 Phase 3: Intervention development

34  
35 In the third phase, the meetings of the Action Teams take place. The meetings with the  
36 Action Teams are ideally held biweekly during school hours for one hour. Despite not all  
37 schools agreeing to this in the needs assessment, the researchers try to schedule meetings  
38 during school hours to raise the children's motivation for participation <sup>27</sup>. If the schools do  
39 not agree with this, meetings are held weekly for 45 minutes, followed by a 45-minute  
40 sports session <sup>27</sup>.  
41  
42  
43  
44  
45

46 The first three to four meetings are used to verify the data that was gathered in a  
47 participatory needs assessment and to decide on determinants that the interventions need  
48 to focus on <sup>27</sup>. In the rest of the meetings (approximately 10 per year) we develop  
49 interventions together with the children targeting children's physical activity and healthy  
50 dietary habits. The type of the interventions (e.g. environmental changes, organisational  
51 changes, or educational approaches) is dependent on this collaborative process. Throughout  
52 these meetings, capacity building takes place to help the children through the process of  
53 intervention development. Children learn for example about formulating a research  
54  
55  
56  
57  
58  
59  
60

1  
2  
3 question, different kinds of research methodologies, how to analyse qualitative data, how to  
4 translate this data into intervention ideas and practical steps that need to be taken when  
5 developing intervention plans. At the end of phase 3, pilots of the first intervention activities  
6 are carried out. The Action Teams are also asked to identify 'Champions', i.e. people who can  
7 help them with the development and implementation of the pilots. A champion is a well-  
8 known community member such as a teacher, sports coach or family member. Children  
9 discuss who they think is suitable to assist them with a specific intervention and  
10 subsequently ask the champions to fulfil this task. The results of this phase (i.e. the needs  
11 assessment, the intervention ideas and results of the pilots) are discussed with the  
12 stakeholders in the project group to make sure the interventions become a joint and  
13 sustainable effort.

14  
15  
16 At the end of the year, a focus group with the Action Teams and their peers is held to discuss  
17 the feeling of empowerment that the children of the neighbourhood experience as part of  
18 the process evaluation.

#### 19 Phase 4: Implementation and evaluation of interventions

20  
21  
22 In the beginning of phase 4, new Action Teams are recruited/formed. Children who were in  
23 the Action Teams of the previous year can still participate and are approached first. With the  
24 new Action Teams, meetings are planned monthly. Champions are involved and asked to  
25 participate in the meetings when appropriate. Together with stakeholders from the project  
26 group and the Action Teams, the implementation plans are finalized and subsequently the  
27 interventions are implemented. In order to offer sustainable interventions we looked for  
28 partners within the community whose job description aligns with providing the intervention.  
29 Depending on the type of intervention, implementers could be dieticians, sports coaches or  
30 supermarkets in the community. Once the interventions are implemented, the meetings are  
31 used to evaluate the interventions. If the Action Teams feel the interventions are going well,  
32 they are encouraged to develop and implement additional intervention activities that focus  
33 on other determinants or a different subgroup<sup>37</sup>. At the end of the year, focus groups are  
34 held focusing on empowering children and evaluating interventions. The first effect  
35 measurement (T1) is also executed in this phase.

36  
37  
38  
39  
40  
41  
42  
43  
44  
45  
46  
47  
48  
49  
50  
51  
52  
53  
54  
55  
56  
57  
58  
59  
60

## Phase 5: Gradual transfer of responsibilities

In phase 5, responsibilities are gradually transferred to the identified champions. Specific plans are made together with the champions and other stakeholders to continue the interventions and participatory process after this project has ended. The meetings with the (new) Action Teams continue to take place every month, and are used to evaluate and, if necessary, adapt the interventions and discuss new ideas for interventions. The post-intervention effect measurement (T2) is executed in this phase. The study ends in November 2019.

## 2.5. Measurements

### 2.5.1. Effect evaluation

The primary outcomes of this study include measures of dietary behaviour (consumption of snacks and sugar-sweetened beverages), physical activity (total MVPA time, time spent playing outside, time spent participating in sports), sedentary behaviour (total sedentary time and screen time), self-rated health, and physical fitness. Dietary behaviour, physical activity and screen behaviour is measured by self-report. Additionally, physical activity and sedentary behaviour is measured using an accelerometer. Motor fitness is measured using the MOPER fitness test. In the first school year (T0), questionnaire and accelerometer data are gathered in the period September-October 2016. The fitness tests take place in March-April 2017, 2018 and 2019.

#### *Questionnaire*

A questionnaire is developed containing questions on: the number of small (e.g. crisps, nuts, chocolate) and large (e.g. hamburger, fries, pizza) snacks children eat; the number of sugar-sweetened beverages they drink; their sports and outdoor play participation; their attitude towards sports and outdoor play; their screen behaviour; and their self-rated health. The questionnaire is based on validated items from the ENERGY child questionnaire<sup>38</sup>, the DOiT questionnaire<sup>39</sup>, and the Euroqol<sup>40</sup>. Table 1 presents the questionnaire items, and the validity and reliability of the original items.

The children fill in the questionnaire during school hours, in the presence of a researcher who explains the procedure of completing the questionnaire before handing out the questionnaires. The children are requested to go through the questionnaire section by section, with the researcher giving a short explanation about each section before the

participants fill in that specific section. In this way, examples can be given, for example by showing different sizes of soda cans, and all participants finish at the same time. The questionnaire takes approximately 40 minutes to complete.

Data entry of the multiple-choice questions is done through digital scanning and transferred into SPSS by an independent organization. Qualitative data are manually entered in SPSS.

**Table 1: Questionnaire items, their origin, and reliability and validity** <sup>38-40</sup>

| Questionnaire item                                                                                                                         | Question derived from                                                                                                           | Reliability (ICC/k)/Validity (ICC/k)                                                                                                                                                                                                                     |
|--------------------------------------------------------------------------------------------------------------------------------------------|---------------------------------------------------------------------------------------------------------------------------------|----------------------------------------------------------------------------------------------------------------------------------------------------------------------------------------------------------------------------------------------------------|
| 1. How many days a week do you drink sugar-sweetened beverages?                                                                            | ENERGY child questionnaire                                                                                                      | 0.71/0.59                                                                                                                                                                                                                                                |
| 2. On a day you drink sugar-sweetened beverages, how many glasses/small bottles (250ml), cans (330ml) or big bottles (500ml) do you drink? | Combination ENERGY child questionnaire, DOIT questionnaire                                                                      | ENERGY<br>Glasses/small bottles (250ml) 0.59/0.24<br>Cans (330ml) 0.53/0.44<br>Big bottles (500ml) 0.58/-0.01<br><br>DOIT<br>Cartons/small bottles (200ml) 0.74/0.12<br>Glasses (200ml) 0.45/0.47<br>Cans (330ml) 0.61/0.24<br>Bottles (500ml) 0.28/0.17 |
| 3. How many days a week do you drink energy drinks or sports drinks?                                                                       | Added based on Q1                                                                                                               |                                                                                                                                                                                                                                                          |
| 4. On a day you drink energy drinks or sports drinks, how many small cans/bottles (250ml) or big cans/bottles (500ml) do you drink?        | Added based on Q2                                                                                                               |                                                                                                                                                                                                                                                          |
| 5. How many school days per week do you eat sweets?                                                                                        | DOIT questionnaire (adapted)<br>Original: 'How many days a week do you eat sweets?'                                             | 0.66/0.60                                                                                                                                                                                                                                                |
| 6. When you eat candy on a school day, how much sweets do you eat?                                                                         | DOIT questionnaire                                                                                                              | 0.71/0.21                                                                                                                                                                                                                                                |
| 7. How many days in the weekend (Saturday/Sunday) do you eat sweets?                                                                       | DOIT questionnaire (adapted)<br>Original: 'How many days a week do you eat sweets?'                                             | 0.66/0.60                                                                                                                                                                                                                                                |
| 8. When you eat sweets on a day in the weekend, how much candy do you eat?                                                                 | DOIT questionnaire                                                                                                              | 0.73/0.07                                                                                                                                                                                                                                                |
| 9. How many schooldays per week do you eat snacks?                                                                                         | DOIT questionnaire (adapted)<br>Original: 'How many days a week do you eat snacks?'                                             | 0.50/-0.11                                                                                                                                                                                                                                               |
| 10. When you eat snacks on a school day, how many small and large snacks do you eat?                                                       | DOIT questionnaire                                                                                                              | Small snacks 0.62/0.13<br>Large snacks 0.58/-0.08                                                                                                                                                                                                        |
| 11. How many days in the weekend (Saturday/Sunday) do you eat snacks?                                                                      | DOIT questionnaire (adapted)<br>Original: 'How many days a week do you eat snacks?'                                             | 0.50/-0.11                                                                                                                                                                                                                                               |
| 12. When you eat snacks in the weekend (Saturday/Sunday), how many small and large snacks do you eat?                                      | DOIT questionnaire                                                                                                              | Small snacks 0.53/0.44<br>Large snacks 0.64/0.08                                                                                                                                                                                                         |
| 13. How do you usually travel to school?                                                                                                   | DOIT questionnaire                                                                                                              | Not in test-retest study                                                                                                                                                                                                                                 |
| 14. How long does it take you to get from home to school?                                                                                  | DOIT questionnaire + ENERGY child questionnaire (adapted)<br>Original: 'If you walk/bike to school, how long does it take you?' | DOIT<br>Walking 0.65/ zero variance<br>Biking 0.91/0.68<br><br>ENERGY<br>Walking 0.70/0.59<br>Biking 0.81/0.66                                                                                                                                           |
| 15. What do you usually do when you play outside at school?                                                                                | ENERGY child questionnaire                                                                                                      | 0.80/0.65                                                                                                                                                                                                                                                |
| 16. I like playing outside                                                                                                                 | ENERGY child questionnaire - Adapted from Q20                                                                                   |                                                                                                                                                                                                                                                          |
| 17. I play outside never/1-2 times a week/3-4 times a week/5-6 times a week/every day                                                      | Added                                                                                                                           |                                                                                                                                                                                                                                                          |
| 18. When you play outside after school, what do you do?                                                                                    | ENERGY child questionnaire - Adapted from Q15                                                                                   |                                                                                                                                                                                                                                                          |

|                                                                                                                                                                                                                                                                    |                                                                                                                                                                                                                                                                                                                                                                                                   |                                                                                              |
|--------------------------------------------------------------------------------------------------------------------------------------------------------------------------------------------------------------------------------------------------------------------|---------------------------------------------------------------------------------------------------------------------------------------------------------------------------------------------------------------------------------------------------------------------------------------------------------------------------------------------------------------------------------------------------|----------------------------------------------------------------------------------------------|
| 19. When you play outside after school, how long do you play? (fill in the number of hours per day in table)                                                                                                                                                       | Added                                                                                                                                                                                                                                                                                                                                                                                             |                                                                                              |
| 20. I like playing sports                                                                                                                                                                                                                                          | ENERGY child questionnaire                                                                                                                                                                                                                                                                                                                                                                        | 0.64/0.09                                                                                    |
| 21. I play sports often/sometimes/never                                                                                                                                                                                                                            | Added                                                                                                                                                                                                                                                                                                                                                                                             |                                                                                              |
| 22a. Do you participate in sports in your free time?<br>22b. How many times per week do you do this sport?<br>22c. How many hours per day do you do this sport?<br>(fill in all sports that you do, the number of times and number of hours per week in the table) | DOIT questionnaire (adapted)<br>Original:<br>1. 'Do you participate in a sport at a sports club?'<br>2. 'How many hours a week do you do this sport?'<br>3. 'Do you participate in a second sport at a sports club?'<br>4. 'How many hours a week do you do this second sport?'<br>5. 'Do you participate in sports outside a sports club?'<br>6. 'How many hours a week do you do these sports?' | 1. 0.98/0.86<br>2. 0.94/0.78<br>3. 0.79/0.69<br>4. 0.76/0.96<br>5. 0.64/0.33<br>6. 0.64/0.45 |
| 23. About how many hours a day do you usually watch television/DVDs/movies on the tablet or iPad in your free time? (fill in the number of hours per day in table)                                                                                                 | ENERGY child questionnaire (adapted)<br>Original: 'About how many hours a day do you usually watch television in your free time?' (weekdays and weekend days)                                                                                                                                                                                                                                     | Weekdays 0.67/0.63<br>Weekend days 0.68/0.56                                                 |
| 24. About how many hours a day do you usually play games on your game computer, iPad, smartphone or surfing on the internet in your free time? (fill in the number of hours per day in table, weekdays and weekend days)                                           | ENERGY child questionnaire (adapted)<br>Original: 'About how many hours a day do you usually play games on a computer, or use your computer in your free time?' (weekdays and weekend days)                                                                                                                                                                                                       | Weekdays 0.67/0.35<br>Weekend days 0.67/0.65                                                 |
| 25. How do you rate your health today?                                                                                                                                                                                                                             | Euroqol EQ-5D-Y Dutch                                                                                                                                                                                                                                                                                                                                                                             | 0.83/ -0.51                                                                                  |

### Accelerometer

Physical activity and sedentary behaviour is objectively assessed by ActiGraph GT3X+ accelerometers. The children receive instructions and the accelerometers from an academic researcher after filling in the questionnaire. Children are asked to wear the small and light-weight (4.6 x 3.3 x 1.5 cm; 19 grams) accelerometer on the right hip for eight consecutive days during all waking hours except for water-based activities.

The children receive the accelerometer after completing the questionnaire. The children also receive a diary in which the instructions are summarized and they can write down when and why they did not wear the accelerometer, if applicable. Additionally, they are asked to write down the time they went to bed. All children who participate in the questionnaire- and accelerometer measurements receive a small present after returning the accelerometer.

Additionally, at each school there is one prize for a participant who wore the accelerometer properly (seven days, at least ten hours) and recorded their data correctly in their diary.

Data are downloaded from the accelerometers into the ActiLife programme in 15 second epochs. Accelerometer data is analysed using a customized software programme developed in R. We select a cut point of 100 counts per minute (cpm) for sedentary behaviour<sup>41 42</sup> and



1  
2  
3 a cut point of 3000 cpm for MVPA<sup>43</sup>. Non-wear time is defined as a period of  $\geq 60$  minutes of  
4 consecutive zeros<sup>44</sup>. For inclusion in the data analysis, each participant needs a minimum of  
5 six days with at least eight valid hours, including at least one weekend day<sup>44</sup>. Data is  
6 analysed on total time spent in MVPA and sedentary, and time in bouts spent in MVPA and  
7 sedentary.  
8  
9  
10  
11  
12

### 13 14 *MOPER*

15 Children's motor fitness is measured using the Motor Performance Test (MOPER). The  
16 MOPER tests speed, flexibility, endurance, coordination and strength by means of eight tests  
17  
18  
19  
20  
21  
22  
23  
24  
25  
26  
27  
28  
29  
30  
31  
32  
33  
34  
35  
36  
37  
38  
39  
40  
41  
42  
43  
44  
45  
46  
47  
48  
49  
50  
51  
52  
53  
54  
55  
56  
57  
58  
59  
60  
45. For practical reasons, the arm pull and 12-minute endurance test have been replaced,  
leading to the following tests: 1) hang as long as possible on a horizontal bar with flexed  
arms; 2) jump as high as possible from a standing position; 3) run 10x5 meters as fast as  
possible; 4) reach as far as possible from a sitting position; 5) hand grip strength measured  
using a dynamometer<sup>46 47</sup>(instead of arm pull); 6) lie on their back and lift their extended  
legs ten times as fast as possible; 7) tap two plates which are 75 cm apart with the preferred  
hand 50 times as fast as possible; and 8) shuttle run test<sup>48 49</sup>(instead of 12-minute  
endurance test). Children can do tests one and eight once. Tests two and five are executed  
twice, but when the difference between one and two is more than 10%, a third try is  
performed. The highest score is used. The other tests are performed twice and the highest  
score is used. The first seven activities of the MOPER test are executed during one Physical  
Education (PE) class by the PE teacher together with five or six research assistants. The PE  
teacher conducts the shuttle run test in a separate PE class. All research assistants and PE  
teachers are trained by an academic researcher on how the tests should be executed. At the  
end of the study, or when children from the highest grade leave the school, the PE teacher  
anonymously shares the results of the test. Parents receive an information letter with a  
passive consent form, which should be signed by at least one of the parents if they object to  
anonymously sharing the fitness test results of their child with the researchers.

### 54 **2.5.2. Process evaluation**

55 The process evaluation includes the description of the process of co-creating interventions,  
56 combining IM and YPAR, and empowerment. The PAR process is continually evaluated in the  
57 Action Team meetings, and meetings are optimized in accordance with the evaluation<sup>28</sup>. The  
58  
59  
60

1  
2  
3 academic researcher and research assistant who are part of the Action Teams evaluate after  
4 every meeting, using a reflection form consisting of a summary of the meeting, what the  
5 setting was like, the group process and a personal reflection <sup>50-52</sup>.

6  
7  
8 The interventions are developed by combining the YPAR and IM methodologies in an  
9 iterative process and are continuously evaluated during the meetings of the Action Teams  
10 and with the children participating in the interventions. In collaboration with the Action  
11 Teams, it is determined how to evaluate the experiences of children with the interventions.  
12 The Action Teams can for example interview peers or develop a questionnaire. The goal of  
13 these evaluations is to see how their peers perceive the interventions and whether quick  
14 adaptations need to be made. At the end of each school year, focus groups are organized  
15 with children from both the Action Teams and their peers, as well as champions to reflect  
16 upon the implementation of ongoing interventions and on the empowerment process.  
17 Empowerment consists of a combination of individual, organizational, and community  
18 empowerment <sup>53</sup>. In our research, we mostly focus on the empowerment of children  
19 (individual), but this cannot be evaluated without taking the organizational (school) and  
20 community empowerment into account <sup>54</sup>. The focus groups consist of two exercises. The  
21 first exercise is mainly focused on individual empowerment, evaluating what children have  
22 learnt about the process of intervention development, how they see their role, and  
23 competences <sup>55 56</sup>. The children can choose an intervention idea which has not been further  
24 developed yet. For this intervention they have to make a timeline with all the steps they  
25 need to take from coming up with the idea through to implementation. The researchers  
26 guide them through questions, for example: in which order do the steps need to be written  
27 down?; do they think they can execute this step by themselves?; if not, do they know where  
28 they can get help? <sup>55</sup>. The second exercise evaluates the organizational and community  
29 empowerment. In pairs, the children first indicate which changes happened at school or in  
30 the community; then they indicate whether children had any influence on the changes;  
31 finally, the findings are discussed in a plenary session. Again the researchers ask questions,  
32 for example: how do you feel when you have influence on changes in the  
33 community/school?; do you think children have enough influence?; would different changes  
34 have been made if children had had more influence? The findings of this focus group provide  
35 critical understanding of the environment, what children have learnt, to what extent  
36  
37  
38  
39  
40  
41  
42  
43  
44  
45  
46  
47  
48  
49  
50  
51  
52  
53  
54  
55  
56  
57  
58  
59  
60

1  
2  
3 children participate in the organizational setting and community, and what collective action  
4 has already been taken <sup>54-56</sup>.

5  
6  
7  
8 Of all hard-copy research data gathered in the PAR meetings, identifiable information is  
9 removed and the data are stored in a locked cabinet at the research location until the study  
10 is completed. All online data are coded and stored on the VUmc protected drive until five  
11 years after the completion date of the study; data from the questionnaires, accelerometers,  
12 MOPER and personal data are saved with encryption. Hard-copies of the questionnaires and  
13 the audio-recordings are also stored at the VUmc until five years after the study is  
14 completed. The three researchers on this project, who are also the authors of this paper, are  
15 the only ones who have full access to the trial data. Research assistants have limited and  
16 temporary access to copies of the data.  
17  
18  
19  
20  
21  
22  
23  
24

### 25 2.5.3. Sample size calculation

26 Using a significance level of 0.05 and a power of 0.80, 180 children per group are needed to  
27 detect a difference of 0.15SD in the primary outcome variables. Taking into account dropout  
28 and clustering of data within schools we aim to include 240 children per group.  
29  
30  
31  
32

### 33 2.5.4. Data analysis

#### 34 *Effect evaluation*

35 To test for baseline differences in the dependent variables between control and intervention  
36 groups, t-test for continuous variables and chi-square tests for categorical variables are used.  
37 Effectiveness of the interventions on dietary behaviour, physical activity, sedentary  
38 behaviour, physical fitness and self-rated health is evaluated using multi-level regression  
39 analysis with a 3-level structure (i.e. student, class, school) to adjust for clustering of  
40 observations. Analyses are adjusted for age, gender, ethnicity and baseline levels. Data are  
41 analysed according to the intention-to-treat principle. All statistical analyses are performed  
42 in SPSS, using a significance level of  $P < 0.05$ .  
43  
44  
45  
46  
47  
48  
49  
50  
51

#### 52 *Process evaluation*

53 Evaluation of the PAR process and its meetings are mainly performed by the Action Teams  
54 themselves. The academic researcher stimulates the children to find patterns and relations  
55 in the findings of their own research and assists in interpretation <sup>57</sup>. Children can for example  
56 look at the pictures they have taken and write down why they took the picture and what  
57  
58  
59  
60

1  
2  
3 they want to say with the picture. Children can also write down the key issues that come up  
4  
5 in the interviews they have conducted and see if they can identify a pattern. By giving  
6  
7 children this role in qualitative data analysis, less misinterpretation of data occurs (than  
8  
9 would be the case with adults trying to interpret the children's findings).

10  
11 In addition, all meetings are summarized and include field notes, and key meetings are fully  
12  
13 transcribed<sup>50</sup>. The academic researcher analyses these transcripts to enrich the children's  
14  
15 findings. When, for example, the children discuss the pictures they have taken, these  
16  
17 discussions may also contain valuable information in addition to the pictures and conclusions  
18  
19 of the children. All summaries and transcripts are coded in ATLAS.ti by two researchers to  
20  
21 improve the reliability of the study. For the entire process evaluation, an elaborate coding  
22  
23 scheme is produced through open coding<sup>57</sup>. For specific aspects like the evaluation of an  
24  
25 intervention, coding is done separately resulting in its own coding scheme. For evaluations  
26  
27 relating to empowerment, closed coding is used as this will be linked to a conceptual model.

### 28 29 **3. DISCUSSION**

30  
31 In the Kids in Action project, children are involved throughout the entire research process.  
32  
33 This YPAR approach has previously shown promising results for communities in need with  
34  
35 respect to researchers' understanding of the community, lowering health disparities,  
36  
37 increasing children's skills (e.g. research skills, life skills), critical awareness, involvement and  
38  
39 empowerment concerning community action<sup>58-60</sup>.

40  
41 In the Kids in Action project, children are not involved in the first phase of this study, in  
42  
43 which partnerships with other stakeholders in the community have to be set up. This is  
44  
45 because creating partnerships can be time-consuming and not very interesting for children,  
46  
47 and we do not want to lower their spirits<sup>37</sup>. The partnerships are important in YPAR for  
48  
49 creating support in the community for the study<sup>58 61</sup> and are beneficial in the rest of the  
50  
51 research process and outcomes.

52  
53 A difference between this study and most YPAR studies is that 9 – 12-year-old children are  
54  
55 involved as co-researchers, whereas most YPAR studies collaborate with adolescents older  
56  
57 than 12<sup>62</sup>. Younger children can be more easily distracted, have a limited attention span and  
58  
59 might need more 'play', all of which should be taken into account when designing the  
60  
61 meetings. Meetings should not be too long, should contain fun and playful exercises, and  
wording should be suitable for the children, while retaining key principles of YPAR. These

1  
2  
3 principles include: sharing power between researchers and children; training children to  
4 participate in research and identify needs in their community; teaching children how to  
5 become advocates; creating ownership over the process; and creating involvement in  
6 establishing change in their community<sup>63</sup>. When all of this is done with care, children  
7 between 9 and 12 years old are capable of joining in YPAR research<sup>64-66</sup>.

13 One implication of working with 9 – 12-year-old children is that you often have to  
14 collaborate intensively with the schools. This could mean that changes in the planning have  
15 to be made beforehand or during the project, based on the schools' preferences, holidays  
16 and other reasons for cancelling meetings<sup>37</sup>. Also, the approval and assistance of schools  
17 and other community organizations are likely to be needed for implementing the  
18 interventions. Because this is a community project, all primary schools in the neighbourhood  
19 are included in the intervention and randomization of schools is not possible. However, the  
20 inclusion of comparable control schools is a strength of this study as this is seldom included  
21 in PAR<sup>67</sup>. Another strength of this study is the combination of YPAR with IM, which makes  
22 sure that evidence-based strategies are being applied. As far as we know, this has not been  
23 done before.

33 A challenge for all intervention studies in real life is that other initiatives can also take place  
34 in the neighbourhood. This is part of usual care and can take place both in the intervention  
35 school and the control school neighbourhoods, and may dilute intervention effects.

## 40 **AUTHOR'S CONTRIBUTIONS**

42 All authors worked on the design of this study. MA is the coordinating researcher on the  
43 project, coordinating the effect measurements, process evaluation, leading the participatory  
44 process and facilitating the Action Teams. TA and MC designed the study. The paper was  
45 drafted by MA, with MC and TA providing comments and revisions to drafts. All authors  
46 approved the final version.

## 52 **ACKNOWLEDGEMENT**

54 The authors thank the children who participated in the Action Teams for their contribution  
55 to this study.

## STATEMENTS

This work is supported by FNO, grant number 101569. The funder has no role in the study design; collection, analysis and interpretation of data; writing the report; and the decision to submit the report for publication.

The authors declare that they have no competing interests.

## REFERENCES

1. CBS. Ervaren gezondheid, zorggebruik en leefstijl bij kinderen tot 12 jaar 2016 [Available from: <http://statline.cbs.nl/Statweb/publication/?DM=SLNL&PA=83716NED&D1=89&D2=0&D3=l&D4=0&D5=2&VW=T> accessed 12-12 2017.
2. GGD. Gezondheid in beeld: GGD Amsterdam; 2016 [Available from: <https://amsterdam.ggdgezondheidinbeeld.nl/jeugd/> accessed 12-12 2017.
3. Gemeente Amsterdam. Staat van gezond gewicht en leefstijl van Amsterdamse kinderen, 2017:1-46.
4. Chi DL, Luu M, Chu F. A scoping review of epidemiologic risk factors for pediatric obesity: Implications for future childhood obesity and dental caries prevention research. *J Public Health Dent* 2017;77 Suppl 1:S8-S31. doi: 10.1111/jphd.12221
5. Kumanyika SK, Whitt-Glover MC, Haire-Joshu D. What works for obesity prevention and treatment in black Americans? Research directions. *Obes Rev* 2014;15 Suppl 4:204-12. doi: 10.1111/obr.12213
6. Wang Y, Lim H. The global childhood obesity epidemic and the association between socio-economic status and childhood obesity. *Int Rev Psychiatry* 2012;24(3):176-88. doi: 10.3109/09540261.2012.688195
7. Taveras EM, Gillman MW, Kleinman K, et al. Racial/ethnic differences in early-life risk factors for childhood obesity. *Pediatrics* 2010;125(4):686-95. doi: 10.1542/peds.2009-2100
8. Wang Y, Beydoun MA. The obesity epidemic in the United States--gender, age, socioeconomic, racial/ethnic, and geographic characteristics: a systematic review and meta-regression analysis. *Epidemiol Rev* 2007;29:6-28. doi: 10.1093/epirev/mxm007
9. CBS. Leefstijl en preventie; geslacht, leeftijd, persoonskenmerken 2016 [Available from: <http://statline.cbs.nl/Statweb/publication/?DM=SLNL&PA=83385ned&D1=11-15&D2=a&D3=a&D4=5-9&D5=0&D6=l&VW=T> accessed 12-12 2017.
10. Singh AS, Mulder C, Twisk JW, et al. Tracking of childhood overweight into adulthood: a systematic review of the literature. *Obes Rev* 2008;9(5):474-88. doi: 10.1111/j.1467-789X.2008.00475.x

- 1  
2  
3 11. Hirasing RA, Fredriks AM, van Buuren S, et al. [Increased prevalence of overweight and obesity in  
4 Dutch children, and the detection of overweight and obesity using international criteria and  
5 new reference diagrams]. *Ned Tijdschr Geneeskd* 2001;145(27):1303-8.  
6  
7
- 8 12. Schonbeck Y, Talma H, van Dommelen P, et al. Increase in prevalence of overweight in Dutch  
9 children and adolescents: a comparison of nationwide growth studies in 1980, 1997 and  
10 2009. *PLoS One* 2011;6(11):e27608. doi: 10.1371/journal.pone.0027608  
11  
12
- 13 13. Bahia L, Schaan CW, Sparrenberger K, et al. Overview of meta-analysis on prevention and  
14 treatment of childhood obesity. *J Pediatr (Rio J)* 2018 doi: 10.1016/j.jpmed.2018.07.009  
15  
16
- 17 14. Wang Y, Cai L, Wu Y, et al. What childhood obesity prevention programmes work? A systematic  
18 review and meta-analysis. *Obes Rev* 2015;16(7):547-65. doi: 10.1111/obr.12277  
19  
20
- 21 15. Pandita A, Sharma D, Pandita D, et al. Childhood obesity: prevention is better than cure. *Diabetes*  
22 *Metab Syndr Obes* 2016;9:83-9. doi: 10.2147/DMSO.S90783  
23  
24
- 25 16. Davison KK, Birch LL. Childhood overweight: a contextual model and recommendations for future  
26 research. *Obes Rev* 2001;2(3):159-71.  
27  
28
- 29 17. Metcalf B, Henley W, Wilkin T. Effectiveness of intervention on physical activity of children:  
30 systematic review and meta-analysis of controlled trials with objectively measured outcomes  
31 (EarlyBird 54). *BMJ* 2012;345:e5888. doi: 10.1136/bmj.e5888  
32  
33
- 34 18. Cushing CC, Brannon EE, Suorsa KI, et al. Systematic review and meta-analysis of health  
35 promotion interventions for children and adolescents using an ecological framework. *J*  
36 *Pediatr Psychol* 2014;39(8):949-62. doi: 10.1093/jpepsy/jsu042  
37  
38
- 39 19. Kamath CC, Vickers KS, Ehrlich A, et al. Clinical review: behavioral interventions to prevent  
40 childhood obesity: a systematic review and metaanalyses of randomized trials. *J Clin*  
41 *Endocrinol Metab* 2008;93(12):4606-15. doi: 10.1210/jc.2006-2411  
42  
43
- 44 20. Lorenc T, Petticrew M, Welch V, et al. What types of interventions generate inequalities?  
45 Evidence from systematic reviews. *J Epidemiol Community Health* 2013;67(2):190-3. doi:  
46 10.1136/jech-2012-201257  
47  
48
- 49 21. Chung A, Backholer K, Wong E, et al. Trends in child and adolescent obesity prevalence in  
50 economically advanced countries according to socioeconomic position: a systematic review.  
51 *Obes Rev* 2016;17(3):276-95. doi: 10.1111/obr.12360  
52  
53
- 54 22. Stamatakis E, Wardle J, Cole TJ. Childhood obesity and overweight prevalence trends in England:  
55 evidence for growing socioeconomic disparities. *Int J Obes (Lond)* 2010;34(1):41-7. doi:  
56 10.1038/ijo.2009.217  
57  
58
- 59 23. Gittelsohn J, Anderson Steeves E, Mui Y, et al. B'More Healthy Communities for Kids: design of a  
60 multi-level intervention for obesity prevention for low-income African American children.  
*BMC Public Health* 2014;14:942. doi: 10.1186/1471-2458-14-942

- 1
- 2
- 3 24. Brown HE, Atkin AJ, Panter J, et al. Family-based interventions to increase physical activity in
- 4 children: a systematic review, meta-analysis and realist synthesis. *Obes Rev* 2016;17(4):345-
- 5 60. doi: 10.1111/obr.12362
- 6
- 7
- 8 25. Kok G, Peters LWH, Ruiters RAC. Planning theory- and evidence-based behavior change
- 9 interventions: a conceptual review of the intervention mapping protocol. *Psicologia: Reflexão*
- 10 *e Crítica* 2017;30(1):19. doi: 10.1186/s41155-017-0072-x
- 11
- 12
- 13 26. Bartholomew Eldredge LK, Markham CM, Ruiters RAC, et al. Planning Health Promotion Programs:
- 14 an Intervention Mapping Approach. Fourth ed: John Wiley & Sons 2016.
- 15
- 16 27. Anselma M, Chinapaw MJM, Altenburg TM. Determinants of Child Health Behaviors in a
- 17 Disadvantaged Area from a Community Perspective: A Participatory Needs Assessment. *Int J*
- 18 *Environ Res Public Health* 2018;15(4) doi: 10.3390/ijerph15040644
- 19
- 20 28. Baum F, MacDougall C, Smith D. Participatory action research. *J Epidemiol Community Health*
- 21 2006;60(10):854-7. doi: 10.1136/jech.2004.028662
- 22
- 23 29. Rodriguez LF, Brown TM. From voice to agency: guiding principles for participatory action
- 24 research with youth. *New Dir Youth Dev* 2009;2009(123):19-34, 11. doi: 10.1002/yd.312
- 25
- 26 30. Ozer EJ. Youth-Led Participatory Action Research: Developmental and Equity Perspectives. *Adv*
- 27 *Child Dev Behav* 2016;50:189-207. doi: 10.1016/bs.acdb.2015.11.006
- 28
- 29 31. Cammarota J, & Fine, M. Youth Participatory Action Research. In: Cammarota J, & Fine, M., ed.
- 30 Revolutionizing education. New York, United States of America: Routledge 2008:1-11.
- 31
- 32 32. London JK, Zimmerman, K. Erbstein, N. Youth-Led Research and Evaluation: Tools for Youth,
- 33 Organizational, and Community Development. *NEW DIRECTIONS FOR EVALUATION*
- 34 2003(98):33-45.
- 35
- 36 33. Suleiman AB, Soleimanpour, S., London, J. Youth Action for Health Through Youth-Led Research.
- 37 *Journal of Community Practice* 2006;14(1-2):125-45.
- 38
- 39 34. Municipality of Amsterdam. Bevolking buurten naar herkomstgroepering 2017 [Available from:
- 40 <https://www.ois.amsterdam.nl/feiten-en-cijfers/buurten> accessed 05-02 2018.
- 41
- 42 35. GGD Amsterdam. Gezondheid in beeld [cited 2018 05-02]. Available from:
- 43 <https://amsterdam.ggdgezondheidinbeeld.nl/>.
- 44
- 45 36. Municipality of Amsterdam. Gebiedsanalyse 2017 Noord West Stadsdeel Noord 2017 [Available
- 46 from: [https://www.ois.amsterdam.nl/pdf/2017\\_gebiedsanalyse\\_17.pdf](https://www.ois.amsterdam.nl/pdf/2017_gebiedsanalyse_17.pdf) accessed 05-02
- 47 2018.
- 48
- 49 37. Suleiman AB, Soleimanpour S, London J. Youth Action for Health Through Youth-Led Research.
- 50 *Journal of Community Practice* 2006;14(1-2):125-45. doi: 10.1300/J125v14n01\_08
- 51
- 52
- 53
- 54
- 55
- 56
- 57
- 58
- 59
- 60



- 1  
2  
3 38. Singh AS, Vik FN, Chinapaw MJ, et al. Test-retest reliability and construct validity of the ENERGY-  
4 child questionnaire on energy balance-related behaviours and their potential determinants:  
5 the ENERGY-project. *Int J Behav Nutr Phys Act* 2011;8:136. doi: 10.1186/1479-5868-8-136  
6  
7  
8 39. Janssen EH, Singh AS, van Nassau F, et al. Test-retest reliability and construct validity of the DOIT  
9 (Dutch Obesity Intervention in Teenagers) questionnaire: measuring energy balance-related  
10 behaviours in Dutch adolescents. *Public Health Nutr* 2014;17(2):277-86. doi:  
11 10.1017/S1368980012005253  
12  
13 40. Ravens-Sieberer U, Wille N, Badia X, et al. Feasibility, reliability, and validity of the EQ-5D-Y:  
14 results from a multinational study. *Qual Life Res* 2010;19(6):887-97. doi: 10.1007/s11136-  
15 010-9649-x  
16  
17 41. Trost SG, Loprinzi PD, Moore R, et al. Comparison of accelerometer cut points for predicting  
18 activity intensity in youth. *Med Sci Sports Exerc* 2011;43(7):1360-8. doi:  
19 10.1249/MSS.0b013e318206476e  
20  
21 42. Fischer C, Yildirim M, Salmon J, et al. Comparing different accelerometer cut-points for sedentary  
22 time in children. *Pediatr Exerc Sci* 2012;24(2):220-8.  
23  
24 43. Evenson KR, Catellier DJ, Gill K, et al. Calibration of two objective measures of physical activity for  
25 children. *J Sports Sci* 2008;26(14):1557-65. doi: 10.1080/02640410802334196  
26  
27 44. Chinapaw MJ, de Niet M, Verloigne M, et al. From sedentary time to sedentary patterns:  
28 accelerometer data reduction decisions in youth. *PLoS One* 2014;9(11):e111205. doi:  
29 10.1371/journal.pone.0111205  
30  
31 45. Leyten C, Kemper, H.C.G., Verschuur, R. De moper fitheidstest: handleiding en prestatieschalen 9  
32 t/m 11 jarigen. Haarlem: BV Uitgeverij De Vrieseborch 1982.  
33  
34 46. Molenaar HM, Zuidam JM, Selles RW, et al. Age-specific reliability of two grip-strength  
35 dynamometers when used by children. *J Bone Joint Surg Am* 2008;90(5):1053-9. doi:  
36 10.2106/JBJS.G.00469  
37  
38 47. Hamilton GF, McDonald C, Chenier TC. Measurement of grip strength: validity and reliability of  
39 the sphygmomanometer and jamar grip dynamometer. *J Orthop Sports Phys Ther*  
40 1992;16(5):215-9. doi: 10.2519/jospt.1992.16.5.215  
41  
42 48. Matsuzaka A, Takahashi Y, Yamazoe M, et al. Validity of the Multistage 20-M Shuttle-Run Test for  
43 Japanese Children, Adolescents, and Adults 2004.  
44  
45 49. Liu NYS, Plowman SA, Looney MA. The Reliability and Validity of the 20-Meter Shuttle Test in  
46 American Students 12 to 15 Years Old. *Research Quarterly for Exercise and Sport*  
47 1992;63(4):360-65. doi: 10.1080/02701367.1992.10608757  
48  
49  
50  
51  
52  
53  
54  
55  
56  
57  
58  
59  
60

- 1  
2  
3 50. Halcomb EJ, Gholizadeh L, DiGiacomo M, et al. Literature review: considerations in undertaking  
4 focus group research with culturally and linguistically diverse groups. *Journal of Clinical*  
5 *Nursing* 2007;16(6):1000-11. doi: 10.1111/j.1365-2702.2006.01760.x  
6  
7  
8 51. Rabiee F. Focus-group interview and data analysis. *Proc Nutr Soc* 2004;63(4):655-60.  
9  
10 52. Marshall J, Mead G. Editorial: Self-reflective practice and first-person action research. *Action*  
11 *research* 2005;3(3):235-44. doi: 10.1177/1476750305055999  
12  
13 53. Israel BA, Checkoway B, Schulz A, et al. Health education and community empowerment:  
14 conceptualizing and measuring perceptions of individual, organizational, and community  
15 control. *Health Educ Q* 1994;21(2):149-70.  
16  
17  
18 54. Zimmerman M. Empowerment Theory 2012.  
19  
20 55. Perkins DD, Zimmerman MA. Empowerment theory, research, and application. *Am J Community*  
21 *Psychol* 1995;23(5):569-79.  
22  
23 56. Zimmerman MA, Israel BA, Schulz A, et al. Further Explorations in Empowerment Theory: An  
24 Empirical Analysis of Psychological Empowerment. *American Journal of Community*  
25 *Psychology* 1992;20(6):707-27.  
26  
27  
28 57. Corbin J, Strauss A. Grounded Theory Research: Procedures, Canons, and Evaluative Criteria.  
29 *Qualitative Sociology* 1990;13(1):3-21. doi: <https://doi.org/10.1007/BF00988593>  
30  
31 58. Berg M, Coman E, Schensul JJ. Youth Action Research for Prevention: a multi-level intervention  
32 designed to increase efficacy and empowerment among urban youth. *Am J Community*  
33 *Psychol* 2009;43(3-4):345-59. doi: 10.1007/s10464-009-9231-2  
34  
35 59. Foster-Fishman PG, Law KM, Lichty LF, et al. Youth ReACT for Social Change: a method for youth  
36 participatory action research. *Am J Community Psychol* 2010;46(1-2):67-83. doi:  
37 10.1007/s10464-010-9316-y  
38  
39 60. Checkoway B, Allison T, Montoya C. Youth participation in public policy at the municipal level.  
40 *Children and Youth Services Review* 2005;27:1149-62. doi: 10.1016/j.chilyouth.2005.01.001  
41  
42 61. Oen G, Stormark KM. Participatory action research in the implementing process of evidence-  
43 based intervention to prevent childhood obesity: project design of the "Healthy Future"  
44 study. *J Obes* 2013;2013:437206. doi: 10.1155/2013/437206  
45  
46 62. Kim J. Youth Involvement in Participatory Action Research (PAR): Challenges and Barriers. *Critical*  
47 *Social Work* 2016;17(1):38-53.  
48  
49 63. Ozer EJ, Ritterman ML, Wanis MG. Participatory action research (PAR) in middle school:  
50 opportunities, constraints, and key processes. *Am J Community Psychol* 2010;46(1-2):152-66.  
51 doi: 10.1007/s10464-010-9335-8  
52  
53  
54  
55  
56  
57  
58  
59  
60

- 1  
2  
3 64. Caro HE, Altenburg TM, Dedding C, et al. Dutch Primary Schoolchildren's Perspectives of Activity-  
4 Friendly School Playgrounds: A Participatory Study. *Int J Environ Res Public Health* 2016;13(6)  
5 doi: 10.3390/ijerph13060526  
6  
7  
8 65. Wang CC. Youth Participation in Photovoice as a Strategy for Community Change. *Journal of*  
9 *Community Practice* 2006;14(1-2):147-61. doi: 10.1300/J125v14n01\_09  
10  
11 66. Wilson N, Dasho S, Martin AC, et al. Engaging Young Adolescents in Social Action Through  
12 Photovoice. *Journal of Early Adolescence* 2007;27(2):241-61. doi:  
13 10.1177/0272431606294834  
14  
15  
16 67. Leykum LK, Pugh JA, Lanham HJ, et al. Implementation research design: integrating participatory  
17 action research into randomized controlled trials. *Implement Sci* 2009;4:69. doi:  
18 10.1186/1748-5908-4-69  
19  
20  
21  
22  
23  
24  
25  
26  
27  
28  
29  
30  
31  
32  
33  
34  
35  
36  
37  
38  
39  
40  
41  
42  
43  
44  
45  
46  
47  
48  
49  
50  
51  
52  
53  
54  
55  
56  
57  
58  
59  
60

1  
2  
3 **FIGURE LEGEND**

4 Figure 1: Outline of the 'Kids in Action' project  
5  
6  
7  
8  
9  
10  
11  
12  
13  
14  
15  
16  
17  
18  
19  
20  
21  
22  
23  
24  
25  
26  
27  
28  
29  
30  
31  
32  
33  
34  
35  
36  
37  
38  
39  
40  
41  
42  
43  
44  
45  
46  
47  
48  
49  
50  
51  
52  
53  
54  
55  
56  
57  
58  
59  
60

For peer review only

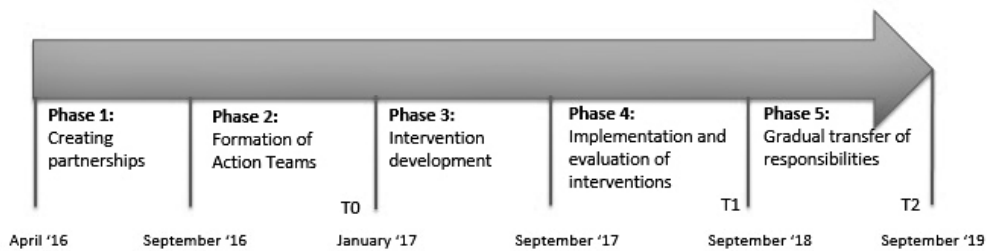

**Continuous activities**

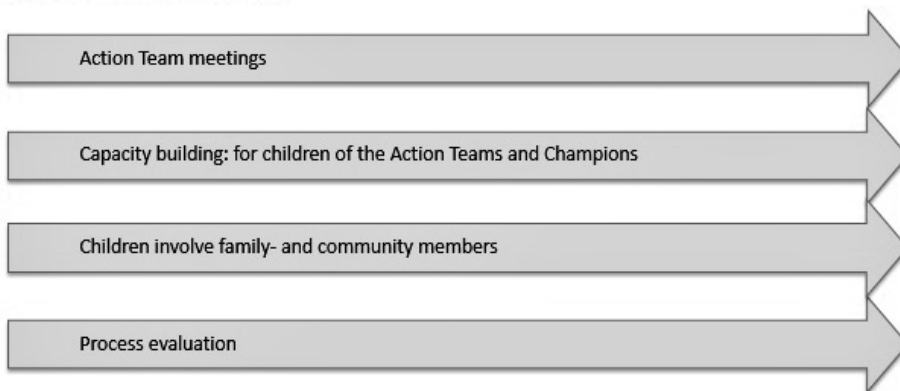

Outline of the 'Kids in Action' project

55x42mm (300 x 300 DPI)

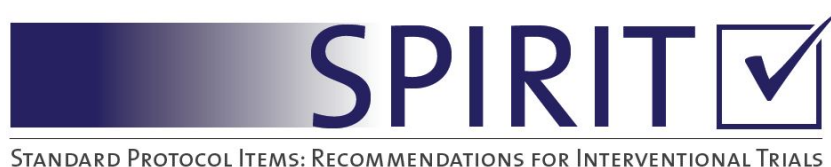

STANDARD PROTOCOL ITEMS: RECOMMENDATIONS FOR INTERVENTIONAL TRIALS

SPIRIT 2013 Checklist: Recommended items to address in a clinical trial protocol and related documents\*

| Section/item                      | Item No | Description – page numbers                                                                                                                                                                                                                                                                                         |
|-----------------------------------|---------|--------------------------------------------------------------------------------------------------------------------------------------------------------------------------------------------------------------------------------------------------------------------------------------------------------------------|
| <b>Administrative information</b> |         |                                                                                                                                                                                                                                                                                                                    |
| Title                             | 1       | Descriptive title identifying the study design, population, interventions, and, if applicable, trial acronym – <a href="#">page 2</a>                                                                                                                                                                              |
| Trial registration                | 2a      | Trial identifier and registry name. If not yet registered, name of intended registry – <a href="#">page 2</a>                                                                                                                                                                                                      |
|                                   | 2b      | All items from the World Health Organization Trial Registration Data Set – <a href="#">throughout paper</a>                                                                                                                                                                                                        |
| Protocol version                  | 3       | Date and version identifier – <a href="#">n/a</a>                                                                                                                                                                                                                                                                  |
| Funding                           | 4       | Sources and types of financial, material, and other support – <a href="#">page 16</a>                                                                                                                                                                                                                              |
| Roles and responsibilities        | 5a      | Names, affiliations, and roles of protocol contributors – <a href="#">page 2 and 16</a>                                                                                                                                                                                                                            |
|                                   | 5b      | Name and contact information for the trial sponsor – <a href="#">page 17</a>                                                                                                                                                                                                                                       |
|                                   | 5c      | Role of study sponsor and funders, if any, in study design; collection, management, analysis, and interpretation of data; writing of the report; and the decision to submit the report for publication, including whether they will have ultimate authority over any of these activities – <a href="#">page 17</a> |
|                                   | 5d      | Composition, roles, and responsibilities of the coordinating centre, steering committee, endpoint adjudication committee, data management team, and other individuals or groups overseeing the trial, if applicable (see Item 21a for data monitoring committee) – <a href="#">n/a</a>                             |
| <b>Introduction</b>               |         |                                                                                                                                                                                                                                                                                                                    |
| Background and rationale          | 6a      | Description of research question and justification for undertaking the trial, including summary of relevant studies (published and unpublished) examining benefits and harms for each intervention – <a href="#">page 3 and 4</a>                                                                                  |
|                                   | 6b      | Explanation for choice of comparators – <a href="#">page 3 and 4</a>                                                                                                                                                                                                                                               |
| Objectives                        | 7       | Specific objectives or hypotheses – <a href="#">page 4</a>                                                                                                                                                                                                                                                         |

1  
2  
3  
4  
5  
6  
7  
8  
9  
10  
11  
12  
13  
14  
15  
16  
17  
18  
19  
20  
21  
22  
23  
24  
25  
26  
27  
28  
29  
30  
31  
32  
33  
34  
35  
36  
37  
38  
39  
40  
41  
42  
43  
44  
45  
46  
47  
48  
49  
50  
51  
52  
53  
54  
55  
56  
57  
58  
59  
60

|              |   |                                                                                                                                                                                                                                          |
|--------------|---|------------------------------------------------------------------------------------------------------------------------------------------------------------------------------------------------------------------------------------------|
| Trial design | 8 | Description of trial design including type of trial (eg, parallel group, crossover, factorial, single group), allocation ratio, and framework (eg, superiority, equivalence, noninferiority, exploratory) – <a href="#">page 4 and 5</a> |
|--------------|---|------------------------------------------------------------------------------------------------------------------------------------------------------------------------------------------------------------------------------------------|

### Methods: Participants, interventions, and outcomes

|               |   |                                                                                                                                                                                                                   |
|---------------|---|-------------------------------------------------------------------------------------------------------------------------------------------------------------------------------------------------------------------|
| Study setting | 9 | Description of study settings (eg, community clinic, academic hospital) and list of countries where data will be collected. Reference to where list of study sites can be obtained – <a href="#">page 5 and 6</a> |
|---------------|---|-------------------------------------------------------------------------------------------------------------------------------------------------------------------------------------------------------------------|

|                      |    |                                                                                                                                                                                                                       |
|----------------------|----|-----------------------------------------------------------------------------------------------------------------------------------------------------------------------------------------------------------------------|
| Eligibility criteria | 10 | Inclusion and exclusion criteria for participants. If applicable, eligibility criteria for study centres and individuals who will perform the interventions (eg, surgeons, psychotherapists) – <a href="#">page 6</a> |
|----------------------|----|-----------------------------------------------------------------------------------------------------------------------------------------------------------------------------------------------------------------------|

|               |     |                                                                                                                                                       |
|---------------|-----|-------------------------------------------------------------------------------------------------------------------------------------------------------|
| Interventions | 11a | Interventions for each group with sufficient detail to allow replication, including how and when they will be administered – <a href="#">page 6-9</a> |
|---------------|-----|-------------------------------------------------------------------------------------------------------------------------------------------------------|

|  |     |                                                                                                                                                                                                                      |
|--|-----|----------------------------------------------------------------------------------------------------------------------------------------------------------------------------------------------------------------------|
|  | 11b | Criteria for discontinuing or modifying allocated interventions for a given trial participant (eg, drug dose change in response to harms, participant request, or improving/worsening disease) – <a href="#">n/a</a> |
|--|-----|----------------------------------------------------------------------------------------------------------------------------------------------------------------------------------------------------------------------|

|  |     |                                                                                                                                                                         |
|--|-----|-------------------------------------------------------------------------------------------------------------------------------------------------------------------------|
|  | 11c | Strategies to improve adherence to intervention protocols, and any procedures for monitoring adherence (eg, drug tablet return, laboratory tests) – <a href="#">n/a</a> |
|--|-----|-------------------------------------------------------------------------------------------------------------------------------------------------------------------------|

|  |     |                                                                                                                     |
|--|-----|---------------------------------------------------------------------------------------------------------------------|
|  | 11d | Relevant concomitant care and interventions that are permitted or prohibited during the trial – <a href="#">n/a</a> |
|--|-----|---------------------------------------------------------------------------------------------------------------------|

|          |    |                                                                                                                                                                                                                                                                                                                                                                                                            |
|----------|----|------------------------------------------------------------------------------------------------------------------------------------------------------------------------------------------------------------------------------------------------------------------------------------------------------------------------------------------------------------------------------------------------------------|
| Outcomes | 12 | Primary, secondary, and other outcomes, including the specific measurement variable (eg, systolic blood pressure), analysis metric (eg, change from baseline, final value, time to event), method of aggregation (eg, median, proportion), and time point for each outcome. Explanation of the clinical relevance of chosen efficacy and harm outcomes is strongly recommended – <a href="#">page 9-14</a> |
|----------|----|------------------------------------------------------------------------------------------------------------------------------------------------------------------------------------------------------------------------------------------------------------------------------------------------------------------------------------------------------------------------------------------------------------|

|                      |    |                                                                                                                                                                                                                        |
|----------------------|----|------------------------------------------------------------------------------------------------------------------------------------------------------------------------------------------------------------------------|
| Participant timeline | 13 | Time schedule of enrolment, interventions (including any run-ins and washouts), assessments, and visits for participants. A schematic diagram is highly recommended (see Figure) – <a href="#">page 6 and Figure 1</a> |
|----------------------|----|------------------------------------------------------------------------------------------------------------------------------------------------------------------------------------------------------------------------|

|             |    |                                                                                                                                                                                                                 |
|-------------|----|-----------------------------------------------------------------------------------------------------------------------------------------------------------------------------------------------------------------|
| Sample size | 14 | Estimated number of participants needed to achieve study objectives and how it was determined, including clinical and statistical assumptions supporting any sample size calculations – <a href="#">page 14</a> |
|-------------|----|-----------------------------------------------------------------------------------------------------------------------------------------------------------------------------------------------------------------|

|             |    |                                                                                                              |
|-------------|----|--------------------------------------------------------------------------------------------------------------|
| Recruitment | 15 | Strategies for achieving adequate participant enrolment to reach target sample size – <a href="#">page 6</a> |
|-------------|----|--------------------------------------------------------------------------------------------------------------|

### Methods: Assignment of interventions (for controlled trials) – [n/a](#)

Allocation:

|    |                |     |                                                                         |
|----|----------------|-----|-------------------------------------------------------------------------|
| 1  |                |     |                                                                         |
| 2  | Sequence       | 16a | Method of generating the allocation sequence (eg, computer-             |
| 3  | generation     |     | generated random numbers), and list of any factors for stratification.  |
| 4  |                |     | To reduce predictability of a random sequence, details of any planned   |
| 5  |                |     | restriction (eg, blocking) should be provided in a separate document    |
| 6  |                |     | that is unavailable to those who enrol participants or assign           |
| 7  |                |     | interventions                                                           |
| 8  |                |     |                                                                         |
| 9  |                |     |                                                                         |
| 10 | Allocation     | 16b | Mechanism of implementing the allocation sequence (eg, central          |
| 11 | concealment    |     | telephone; sequentially numbered, opaque, sealed envelopes),            |
| 12 | mechanism      |     | describing any steps to conceal the sequence until interventions are    |
| 13 |                |     | assigned                                                                |
| 14 |                |     |                                                                         |
| 15 | Implementation | 16c | Who will generate the allocation sequence, who will enrol participants, |
| 16 |                |     | and who will assign participants to interventions                       |
| 17 |                |     |                                                                         |
| 18 | Blinding       | 17a | Who will be blinded after assignment to interventions (eg, trial        |
| 19 | (masking)      |     | participants, care providers, outcome assessors, data analysts), and    |
| 20 |                |     | how                                                                     |
| 21 |                |     |                                                                         |
| 22 |                |     |                                                                         |
| 23 |                | 17b | If blinded, circumstances under which unblinding is permissible, and    |
| 24 |                |     | procedure for revealing a participant's allocated intervention during   |
| 25 |                |     | the trial                                                               |
| 26 |                |     |                                                                         |
| 27 |                |     |                                                                         |

### Methods: Data collection, management, and analysis

|    |                 |     |                                                                                         |
|----|-----------------|-----|-----------------------------------------------------------------------------------------|
| 28 |                 |     |                                                                                         |
| 29 |                 |     |                                                                                         |
| 30 | Data collection | 18a | Plans for assessment and collection of outcome, baseline, and other                     |
| 31 | methods         |     | trial data, including any related processes to promote data quality (eg,                |
| 32 |                 |     | duplicate measurements, training of assessors) and a description of                     |
| 33 |                 |     | study instruments (eg, questionnaires, laboratory tests) along with                     |
| 34 |                 |     | their reliability and validity, if known. Reference to where data                       |
| 35 |                 |     | collection forms can be found, if not in the protocol – <a href="#">‘Measurements’,</a> |
| 36 |                 |     | <a href="#">page 9-13</a>                                                               |
| 37 |                 |     |                                                                                         |
| 38 |                 |     |                                                                                         |
| 39 |                 | 18b | Plans to promote participant retention and complete follow-up – <a href="#">page</a>    |
| 40 |                 |     | <a href="#">6</a> – including list of any outcome data to be collected for participants |
| 41 |                 |     | who discontinue or deviate from intervention protocols – <a href="#">n/a</a>            |
| 42 |                 |     |                                                                                         |
| 43 | Data            | 19  | Plans for data entry, coding, security, and storage, including any                      |
| 44 | management      |     | related processes to promote data quality (eg, double data entry;                       |
| 45 |                 |     | range checks for data values). Reference to where details of data                       |
| 46 |                 |     | management procedures can be found, if not in the protocol – <a href="#">page</a>       |
| 47 |                 |     | <a href="#">10-13</a>                                                                   |
| 48 |                 |     |                                                                                         |
| 49 |                 |     |                                                                                         |
| 50 | Statistical     | 20a | Statistical methods for analysing primary and secondary outcomes.                       |
| 51 | methods         |     | Reference to where other details of the statistical analysis plan can be                |
| 52 |                 |     | found, if not in the protocol – <a href="#">page 14</a>                                 |
| 53 |                 |     |                                                                                         |
| 54 |                 |     |                                                                                         |
| 55 |                 | 20b | Methods for any additional analyses (eg, subgroup and adjusted                          |
| 56 |                 |     | analyses) – <a href="#">page 14</a>                                                     |
| 57 |                 |     |                                                                                         |
| 58 |                 |     |                                                                                         |
| 59 |                 |     |                                                                                         |
| 60 |                 |     |                                                                                         |



- 1  
2  
3  
4  
5  
6  
7  
8  
9  
10  
11  
12  
13  
14  
15  
16  
17  
18  
19  
20  
21  
22  
23  
24  
25  
26  
27  
28  
29  
30  
31  
32  
33  
34  
35  
36  
37  
38  
39  
40  
41  
42  
43  
44  
45  
46  
47  
48  
49  
50  
51  
52  
53  
54  
55  
56  
57  
58  
59  
60
- 20c Definition of analysis population relating to protocol non-adherence (eg, as randomised analysis), and any statistical methods to handle missing data (eg, multiple imputation) – [page 15](#)

### Methods: Monitoring

- Data monitoring 21a Composition of data monitoring committee (DMC); summary of its role and reporting structure; statement of whether it is independent from the sponsor and competing interests; and reference to where further details about its charter can be found, if not in the protocol. Alternatively, an explanation of why a DMC is not needed – [n/a](#)
- 21b Description of any interim analyses and stopping guidelines, including who will have access to these interim results and make the final decision to terminate the trial – [n/a](#)
- Harms 22 Plans for collecting, assessing, reporting, and managing solicited and spontaneously reported adverse events and other unintended effects of trial interventions or trial conduct – [n/a](#)
- Auditing 23 Frequency and procedures for auditing trial conduct, if any, and whether the process will be independent from investigators and the sponsor – [n/a](#)

### Ethics and dissemination

- Research ethics approval 24 Plans for seeking research ethics committee/institutional review board (REC/IRB) approval – [page 2](#)
- Protocol amendments 25 Plans for communicating important protocol modifications (eg, changes to eligibility criteria, outcomes, analyses) to relevant parties (eg, investigators, REC/IRBs, trial participants, trial registries, journals, regulators) – [n/a](#)
- Consent or assent 26a Who will obtain informed consent or assent from potential trial participants or authorised surrogates, and how (see Item 32) – [page 6](#)
- 26b Additional consent provisions for collection and use of participant data and biological specimens in ancillary studies, if applicable – [n/a](#)
- Confidentiality 27 How personal information about potential and enrolled participants will be collected, shared, and maintained in order to protect confidentiality before, during, and after the trial – [page 14](#)
- Declaration of interests 28 Financial and other competing interests for principal investigators for the overall trial and each study site – [page 16](#)
- Access to data 29 Statement of who will have access to the final trial dataset, and disclosure of contractual agreements that limit such access for investigators – [page 14](#)
- Ancillary and post-trial care 30 Provisions, if any, for ancillary and post-trial care, and for compensation to those who suffer harm from trial participation – [n/a](#)

|    |                   |     |                                                                                       |
|----|-------------------|-----|---------------------------------------------------------------------------------------|
| 1  |                   |     |                                                                                       |
| 2  | Dissemination     | 31a | Plans for investigators and sponsor to communicate trial results to                   |
| 3  | policy            |     | participants, healthcare professionals, the public, and other relevant                |
| 4  |                   |     | groups (eg, via publication, reporting in results databases, or other                 |
| 5  |                   |     | data sharing arrangements), including any publication restrictions –                  |
| 6  |                   |     | <a href="#">Through collaboration with the local government, the community and</a>    |
| 7  |                   |     | <a href="#">local professionals are informed. The sponsor writes a report for the</a> |
| 8  |                   |     | <a href="#">general public.</a>                                                       |
| 9  |                   |     |                                                                                       |
| 10 |                   |     |                                                                                       |
| 11 |                   | 31b | Authorship eligibility guidelines and any intended use of professional                |
| 12 |                   |     | writers – <a href="#">n/a</a>                                                         |
| 13 |                   |     |                                                                                       |
| 14 |                   | 31c | Plans, if any, for granting public access to the full protocol, participant-          |
| 15 |                   |     | level dataset, and statistical code – <a href="#">n/a</a>                             |
| 16 |                   |     |                                                                                       |
| 17 |                   |     |                                                                                       |
| 18 | <b>Appendices</b> |     |                                                                                       |
| 19 |                   |     |                                                                                       |
| 20 | Informed consent  | 32  | Model consent form and other related documentation given to                           |
| 21 | materials         |     | participants and authorised surrogates – <a href="#">upon request</a>                 |
| 22 |                   |     |                                                                                       |
| 23 | Biological        | 33  | Plans for collection, laboratory evaluation, and storage of biological                |
| 24 | specimens         |     | specimens for genetic or molecular analysis in the current trial and for              |
| 25 |                   |     | future use in ancillary studies, if applicable – <a href="#">n/a</a>                  |
| 26 |                   |     |                                                                                       |

---

27 \*It is strongly recommended that this checklist be read in conjunction with the SPIRIT 2013  
 28 Explanation & Elaboration for important clarification on the items. Amendments to the  
 29 protocol should be tracked and dated. The SPIRIT checklist is copyrighted by the SPIRIT  
 30 Group under the Creative Commons "[Attribution-NonCommercial-NoDerivs 3.0 Unported](#)"  
 31 license.  
 32  
 33  
 34  
 35  
 36  
 37  
 38  
 39  
 40  
 41  
 42  
 43  
 44  
 45  
 46  
 47  
 48  
 49  
 50  
 51  
 52  
 53  
 54  
 55  
 56  
 57  
 58  
 59  
 60
